1 **Identification and predictability of soil quality factors and indicators from**  
2 **conventional soil and vegetation classifications**

3

4 Paul Simfukwe<sup>a\*</sup>, Paul W. Hill<sup>b</sup>, Bridget A. Emmett<sup>c</sup>, Davey L. Jones<sup>b</sup>

5 <sup>a</sup> *Department of Natural Resources, School of Agriculture and Natural Resources,*  
6 *Mulungushi University, Great North Rd, Kabwe, Central Province, Zambia*

7 <sup>b</sup> *School of Natural Sciences, Bangor University, Bangor, Gwynedd, LL57 2UW, UK*

8 <sup>c</sup> *UK Centre for Ecology and Hydrology, Environment Centre Wales, Bangor,*  
9 *Gwynedd, LL57 2UW, UK*

10

11

12

13 *\*Corresponding author*

14 [psimfukwe@mu.ac.zm](mailto:psimfukwe@mu.ac.zm); [p\\_simfukwe@yahoo.com](mailto:p_simfukwe@yahoo.com)

15

16 Author Contributions

17 Conceived and designed the experiments: DLJ BAE PS. Performed the experiments:

18 PS PWH. Analyzed the data: PS PWH DLJ Wrote the paper: PS PWH PS BAE DLJ.

19

20

21

22

23

24

25

26 **ABSTRACT**

27           Generally, the physical, chemical and biological attributes of a soil combined  
28 with abiotic factors (e.g. climate and topography) drive pedogenesis. However,  
29 biological indicators of soil quality play no direct role in traditional soil classification  
30 and surveys. To support their inclusion in classification schemes, previous studies  
31 have shown that soil type is a key factor determining microbial community  
32 composition in arable soils. This suggests that soil type could be used as proxy for soil  
33 biological function and vice versa. In this study we assessed the relationship between  
34 soil biological indicators with either vegetation cover or soil type. A wide range of  
35 soil attributes were measured on soils from across the UK to investigate whether; (1)  
36 appropriate soil quality factors (SQFs) and indicators (SQIs) can be identified, (2) soil  
37 classification can predict SQIs; (3) which soil quality indicators were more effectively  
38 predicted by soil types, and (4) to what extent do soil types and/ or aggregate  
39 vegetation classes (AVCs) act as major regulators of SQIs. Factor analysis was used  
40 to group 20 soil attributes into six SQFs namely; *Soil organic matter*, *Organic matter*  
41 *humification*, *Soluble nitrogen*, *Microbial biomass*, *Reduced nitrogen* and *Soil*  
42 *humification index*. Of these, *Soil organic matter* was identified as the most important  
43 SQF in the discrimination of both soil types and AVCs. Among the measured soil  
44 attributes constituting the *Soil organic matter* factor were, microbial quotient and bulk  
45 density were the most important attributes for the discrimination of both individual  
46 soil types and AVCs. The *Soil organic matter* factor discriminated three soil type  
47 groupings and four aggregate vegetation class groupings. Only the Peat soil and Heath  
48 and bog AVC were distinctly discriminated from other groups. All other groups  
49 overlapped with one another, making it practically impossible to define reference  
50 values for each soil type or AVC. We conclude that conventionally classified soil

51 types cannot predict the SQIs (or SQFs), but can be used in conjunction with the  
52 conventional soil classifications to characterise the soil types. The two-way ANOVA  
53 showed that the AVCs were a better regulator of the SQIs than the soil types and that  
54 they (AVCs) presented a significant effect on the soil type differences in the measured  
55 soil attributes.

56 *Keywords:* Soil health; Soil quality factor; Multivariate classification; Discriminant  
57 analysis; Cluster analysis

58

## 59 **1. Introduction**

60 The multiple roles and functions of soil have resulted in several broad  
61 definitions of soil quality. One of the most widely adopted definitions for soil quality  
62 (SQ) was proposed by a committee for the Soil Science Society of America (chaired  
63 by Karlen) as: “the capacity of soil to function, within natural or managed ecosystem  
64 boundaries, to sustain plant and animal productivity, maintain or enhance water and  
65 air quality, and support human health and habitation” (Karlen et al., 1997). The  
66 quality of any soil has two parts: (1) the natural or inherent quality which is based on  
67 the parent geological material and soil-state-factors and is rather static, and (2) the  
68 dynamic soil quality which encompasses those soil properties that can change over  
69 relatively short time periods in response to human use and management (Carter, 2002;  
70 Fließbach et al., 2007; Bonfante et al., 2019). In contrast to the inherent SQ, the  
71 dynamic SQ can be used to monitor temporal trends on the same soil. There is no  
72 universally applicable set of inherent SQ criteria and optimum values (Carter, 2002)  
73 because soils with differences in the soil forming factors have different absolute  
74 capabilities (Seybold et al., 1998; Karlen et al., 2001). Therefore, soil quality and  
75 indicators have been defined by very different criteria and approaches dependent on

76 the various functions the soil performs (Rapport et al., 1997; Carter, 2002, Cherubin et  
77 al., 2016). In spite of the lack of standard methodology and “critical limits”, it is  
78 possible to develop SQ ranges for specific soils evaluated with regard to specific land  
79 use and management regimes.

80 Soil quality is evaluated in terms of measurable soil attributes that measure  
81 specific physical, chemical, and biological properties; also known as soil quality  
82 indicators (SQIs; Shukla et al., 2006; Cherubin et al., 2016). Many of these properties  
83 are interrelated and the best SQIs are those that integrate and have the combined  
84 effect of several properties or processes that affect the capacity of a soil to perform  
85 a specified function (Dagnachew et al., 2019). SQIs should generally be linked  
86 and/or correlated with ecosystem processes and functions and should be responsive to  
87 variations in management and climate on an appropriate time scale (Doran and Safley,  
88 1997, Bonfante et al., 2019). The SQIs which respond over the medium term i.e. those  
89 that are sensitive over few years and decades in land uses and management  
90 practices, may be the most useful for indicating soil quality changes as opposed to  
91 those which change either very rapidly (e.g. seasonally) or very slowly (e.g. over  
92 centuries) (Rapport et al., 1997; Dagnachew et al., 2019). Thus, measurement of key  
93 SQIs over time can be used to establish whether the quality of a soil under a given  
94 land use and management system is improving, declining or stable (Shukla et al.,  
95 2006; Ghaemi et al., 2014; Rayo et al., 2017).

96 Soil types are known to be inextricably determined by the physical, chemical  
97 and biological processes operating in soil, yet the biological indicators are rarely used  
98 in traditional soil classification and surveys (Cavigelli et al., 2005). Studies conducted  
99 by a number of researchers, such as Parkin (1993), Buyer et al. (2002), Girvan et al.  
100 (2003) and Ulrich and Becker (2006), have shown that soil type is a key factor

101 determining microbial community composition in arable soils. Furthermore, Rapport  
102 et al. (1997) and Lagomarsino et al. (2009) reported that microorganisms and  
103 microbial communities can provide an integrated measure of soil quality; an aspect  
104 that cannot always be obtained with physical and chemical measures and/or analyses  
105 of higher organisms. Currently, bioindicators are mostly based on so-called sum or  
106 black-box parameters and generally include microbial indicators such as microbial  
107 biomass, activity and biodiversity (Rapport et al., 1997; Nielsen and Winding, 2002;  
108 Schloter, et al., 2018). Recently, an alternative has been proposed, based on the use  
109 of specific ratios that report on function such as the quotients of *microbial*  
110 *respiration-C-to-microbial biomass-C* ( $qCO_2$ ) and the *microbial biomass-C-to-*  
111 *organic matter-C* ratio ( $qMic$ ) (Schloter, et al., 2018). These indicators avoids the  
112 problems of comparing trends in soils with different organic matter or microbial  
113 biomass content and appears to provide a more sensitive indicator of soil changes than  
114 either activity or population measurements alone (Lagomarsino et al., 2009). In this  
115 study, we used multivariate statistical methods to explore these relationships using 20  
116 physico-chemical and biological soil properties as Total Data Set (TDS). Using factor  
117 analysis the 20 correlated variables were reduced to 6 uncorrelated factors (soil  
118 quality factors; SQFs) also called Minimum Data Set (MDS) that were linear  
119 functions of the original 20 variables. The main questions addressed in this study  
120 were: (1) Can soil classification be used to predict SQFs and SQIs? (2) Which SQFs  
121 and SQIs are more effectively predictable by soil type in UK soils? (3) To what extent  
122 do soil types and/or AVCs act as major regulators of SQFs or SQIs?

123

## 124 **2. Materials and methods**

### 125 *2.1. Soil sampling and preparation*

126 Soil samples were collected throughout the UK as part of the Centre for  
127 Ecology and Hydrology Countryside Survey (CS) 2007 (Emmett et al., 2010) with  
128 sites representing the main types of landscape and soil groups. To encompass all the  
129 major soil and land use types, a total of 304 soil samples were collected throughout  
130 the UK, based on a stratified random sample of 1 km squares at gridpoints on a 15 km  
131 grid using the Institute of Terrestrial Ecology (ITE) Land Classification as the basis of  
132 the stratification (Scott, 2008). Figure S1 shows the general location and distribution  
133 of samples across the UK. At each grid intersection, a 1 km<sup>2</sup> sample area was  
134 selected. Within the 1 km<sup>2</sup> sample area, 3 plots (5 × 5 m<sup>2</sup>) were randomly located and  
135 a single 15 cm long × 4 cm diameter soil sample was collected from each of the plots.  
136 Topsoils were only selected for sampling to reflect standard practice in national  
137 monitoring schemes (Bellamy et al., 2005) such as Soil Survey England and Wales  
138 handbook (Hodgson, 1976), the National Soil Monitoring Network (Emmett, B.A.,  
139 2006 ) and the UK Soil Monitoring Network (Environmental Agency, 2008).

140 The soil leachate was collected according to Emmett et al. (2008). The soil  
141 leachate replicate cores were first wetted to field capacity with artificial rainfall (125  
142 μM NaCl, 15.7 μM CaCl<sub>2</sub>, 1.3 μM CaSO<sub>4</sub>, 15.3 μM MgSO<sub>4</sub>, 12.3 μM H<sub>2</sub>SO<sub>4</sub>) in the  
143 dark at 10°C until the soils were fully wetted. The cores were then sprayed with  
144 artificial rainfall until a further 150 ml of leachate had been collected resulting in a  
145 solution with a pH of approximately 4.6. After washing out the cores, a small amount  
146 of suction was applied to drain larger pores. Cores were then incubated under  
147 anaerobic conditions for 4 weeks, at 10 °C, approximately UK mean summer soil

148 temperature Cores were then extracted with 1 M KCl, and ammonium and nitrate  
149 concentrations were determined as a measurement of mineralisable N using a TOC-  
150 VCSH/CSN analyzer (Shimadzu Corp., Kyoto, Japan) as describe below.

151 Across all land uses (Supplementary Information S2) and aggregate vegetation  
152 class (AVC) categories, the dominant soil types (% of total) were: Brown soils (32%),  
153 Groundwater gleys (13%), Surface water gleys (19%), Lithomorphic soils (8 %),  
154 Peats (15%), Pelosols (2%) and Podzolic soils (11%). See Table S1 for their  
155 equivalents in the WRB classification. All the sites were characterised by a temperate  
156 climate with a North-South mean annual temperature range of 7.5 to 10.6°C and East-  
157 West mean annual rainfall range of 650 to 1700 mm.

158

## 159 *2.2. Aggregate vegetation classes*

160 The vegetation data from the plots were analysed using the classification by  
161 Aggregate Classes (ACs) or Aggregate Vegetation Classes (AVCs). The AVCs were  
162 the vegetation types produced from a quantitative hierarchical classification of the  
163 different species found in sample plots. The eight AVCs used for assessing vegetation  
164 condition are listed in Table 1. Across all the soils sampled, the AVCs represented (%  
165 of the total): 18% Crop and weeds, 17% Fertile grasslands, 22% Heath and bogs, 20%  
166 Infertile grasslands, 2% Lowland woodland, 10% Moorland grass mosaics, 4% Tall  
167 grass and herbs and 7% Upland woodland.

168

169 ***Table 1. Summary of the Aggregate Vegetation Classes (AVCs) used for assessment of***  
170 ***vegetation condition. The brackets indicate the abbreviation of the vegetation class***  
171 ***(adapted from Smart et al., 2003).***

172

---

| <b>Aggregate vegetation class (AVC) +(abrev)</b> | <b>Description</b>                                                                                                                                        |
|--------------------------------------------------|-----------------------------------------------------------------------------------------------------------------------------------------------------------|
| 1. Crops and weeds (Craw)                        | Weedy communities of cultivated and disturbed ground, including species-poor arable and horticultural crops.                                              |
| 2. Tall grass and herbs (Tgah)                   | Less intensively managed tall herbaceous vegetation typical of field edges, roadside verges, stream sides and hedge bottoms.                              |
| 3. Fertile grassland (Frtg)                      | Agriculturally improved or semi improved grassland. Often intensively managed agricultural swards with moderate to high abundance of perennial rye grass. |
| 4. Infertile grassland (Infg)                    | Less-productive, unimproved and often species rich grasslands in a wide range of wet to dry and acid to basic situations.                                 |
| 5. Lowland wooded (Lwlw)                         | Vegetation dominated by shrubs and trees in neutral or basic situations, generally in lowland Britain. Includes many hedgerows.                           |
| 6. Upland wooded (Uplw)                          | Vegetation of broadleaved and conifer woodland often in more acidic situations, generally in upland Britain.                                              |
| 7. Moorland grass mosaics (Mrgm)                 | Extensive, often unenclosed and sheep grazed hill pastures throughout Britain.                                                                            |
| 8. Heath and bog (Htab)                          | Vegetation dominated by heathers. Includes drier heaths as well as bog. Mostly in the uplands.                                                            |

---

173

174

175 *2.3. Soil analysis*

176       Soil pH was determined in soil-distilled water extracts (1:2.5 w/v soil to water  
177 soil ratio) using a glass electrode (Gelplas general purpose electrode, BDH) and HI-  
178 209 pH meter (Orion research, Boston, MA, USA). Soil moisture was determined by  
179 weight loss after oven drying at 105°C overnight (>16 h). Water content at field  
180 capacity was estimated by saturating the soil followed by measuring the water  
181 retained in the soil at -33 kPa. Bulk density was calculated (mass/volume) after  
182 removal of stones from the cores (>2 mm in diameter). Loss on ignition (LOI) was  
183 undertaken at 375°C for 16 h. Soil organic carbon (SOC) was calculated from the LOI  
184 values according to the method of Ball (1964) where

185

$$\text{SOC} = (0.458 \times \text{g LOI}) - 0.4 \quad [\text{Eq. 1}]$$



186 Phosphorus was determined by the Olsen P method according to Emmett et al. (2008).  
187 Total C and N were determined using UKAS accredited method SOP3102 on an  
188 Elementar Vario-EL elemental analyser (Elementaranalysensysteme GmbH, Hanau,  
189 Germany) according to Emmett et al. (2008, and 2010).

190 Soil respiration (SR) was determined on a 15 cm long, 2.5 cm diameter soil  
191 cores with a 1250 cm<sup>3</sup> head space. The soils were incubated at 10°C for 1 h (at which  
192 linearity was established). Subsequently, the head space gas was analysed for CO<sub>2</sub>  
193 concentration using a Clarus 500 Gas Chromatograph (Perkin Elmer Corp., Beverley,  
194 MA). The CO<sub>2</sub> flux was established by comparing the CO<sub>2</sub> concentration before and  
195 after incubation. Soil microbial biomass C and N were estimated on moist soil  
196 samples (10 g) using the modified chloroform-fumigation-extraction (CFE) method of  
197 Vance et al. (1987). For each soil 10g of the control and the fumigated samples were  
198 extracted with 1 M KCl. The TOC and TON in the 1 M KCl extracts was determined  
199 using a TOC-VCSH/CSN analyzer (Shimadzu Corp., Kyoto, Japan). Extraction  
200 efficiency correction factors of 0.45 and 0.54 were used for microbial C and N,  
201 respectively (Joergensen and Mueller, 1996a; 1996b; Fließbach et al., 2006). Soil  
202 microbial biomass was therefore calculated according to the formula:  $C_{mic} = EC/kEC$ ,  
203 where  $EC = (TOC \text{ in fumigated samples} - TOC \text{ in control samples})$  and  $kEC = 0.45$ ,  
204 and  $N_{mic} = EN/kEN$ , where  $EN = (total \text{ N in fumigated samples} - total \text{ N in control}$   
205  $samples)$  and  $kEN = 0.54$ . The microbial C:N ratios were subsequently calculated  
206 from these values.

207 The metabolic and microbial quotients were calculated indices. The metabolic  
208 quotient or coefficient was calculated as the ratio between the CO<sub>2</sub>-C from basal  
209 respiration and the microbial biomass-C ( $CO_2-C_{resp-to-C_{mic}}$ ), expressed as  $\mu g \text{ CO}_2\text{-C}$   
210  $mg^{-1} \text{ biomass-C h}^{-1}$ . It is also known as the specific respiration rate ( $qCO_2$ ) (Anderson

211 and Domsch, 1993). The microbial quotient was calculated as the ratio between the  
212 microbial biomass-C-to-total organic C ( $C_{mic-to-C_{org}}$ ).

213

#### 214 *2.4. Leachate analysis*

215 Leachate dissolved organic C (DOC) and total organic N (TON) were  
216 measured using a TOC-VCSH/CSN analyzer (Shimadzu Corp., Kyoto, Japan) and the  
217 DOC:TON ratio subsequently calculated. Nitrate and ammonium concentrations were  
218 measured with a Skalar SAN<sup>++</sup> segmented-flow autoanalyser (Skalar, Breda,  
219 Netherlands), based on the cadmium (Cd) reduction method (Maynard and Kalra,  
220 1993; Griffin, et al., 1995) and the modified Berthelot reaction (Searie, 1984)  
221 respectively. Electrical conductivity (EC) was measured with a standard platinum 1  
222 cm electrode on a 4520-EC meter (Jenway Ltd, Dunmow, Essex, UK). pH was  
223 measured using a glass electrode (Gelplas general purpose electrode, BDH) on a HI-  
224 209 pH meter (Orion research, Boston, MA, USA). Total free amino acids were  
225 determined using the fluorometric OPAME procedure of Jones et al. (2002) and a  
226 Cary Eclipse Fluorescence Spectrophotometer (Varian Inc., Australia) using a leucine  
227 standard. Humic substances were determined by measuring the absorbance of 350  $\mu$ l  
228 of leachate at 254 and 400 nm (UV and visible range respectively) on a PowerWave  
229 XS scanning microplate spectrophotometer (BioTek<sup>®</sup> Instruments, Winooski, VT).  
230 The absorbance of deionised water was used as a control. A humification index (HIX)  
231 was calculated by dividing the absorbance at 254 nm by the absorbance at 400 nm  
232 (Zsolnay et al., 1999; Embachar et al., 2007). Soluble phenolic concentrations were  
233 assayed using a modification of the method of Box (1983) and Ohno and First (1998)  
234 using  $Na_2CO_3$  (1.9 M) and the Folin-Ciocalteu reagent (Sigma-Aldrich, Poole, Dorset)

235 (DeForest et al., 2005). The blue-coloured phenolics were measured at 750 nm using a  
236 PowerWave XS scanning microplate spectrophotometer (BioTek® Instruments).

237

### 238 *2.5. Statistical analyses*

239 ANOVA, Factor, Discriminant and Cluster analyses were all determined using  
240 SPSS version 15.0 (SPSS Inc., Chicago, IL) and GenStat version 8 (VSN  
241 International Ltd, Hemel Hempstead, UK). They were used to analyse the measured  
242 attributes to investigate the effect of soil types and AVCs on the SQIs identified. To  
243 identify significant differences between treatments, post hoc multiple comparison  
244 (pair-wise) tests were made using the Gabriel test where homogeneity of variance was  
245 assumed and Games-Howell procedure where unequal variance occurred. Some  
246 variables were clearly not normally distributed judging from the Q-Q plots (data not  
247 presented); however, all the factors (SQFs) from factor analysis and discriminant  
248 analysis were normally distributed.

249 For the cluster analysis, the average linkage method and a squared Euclidean  
250 distance measure were used with a rescaled distance cluster combined measure on the  
251 similarity axis. The variables were standardized to minimize the effect of scale  
252 differences since the variables possessed different units.

253

## 254 **3. Results**

### 255 *3.1. Biological, physical and chemical properties of soils*

256 The variability of individual soil quality indicators across the range of soil  
257 types is shown in Figure 1. The box plots shows the spread of each measured soil  
258 property for each soil type as well as the data's symmetry and skewness. (The  
259 boundary of the box closest to zero indicates the 25<sup>th</sup> percentile, the line within the

260 box marks the median (50<sup>th</sup> percentile), and the boundary of the box farthest from  
261 zero indicates the 75<sup>th</sup> percentile while the whiskers below and above the box indicate  
262 the 10<sup>th</sup> and 90<sup>th</sup> percentiles where outliers are present). From the box plots, most of  
263 the soil quality indicators did not show differentiations among the soil types save for  
264 the following: microbial quotient, SOC and Soil Respiration separated the peats from  
265 the rest; pH and C:N leachate separated the peats and the podzols from the rest, while  
266 the bulk density grouped the soils in three groups of Pelosols, the Browns, Ground-  
267 water gleys and the Surface-water gleys (average = 1.1 g cm<sup>-3</sup>) in one group; Podzols  
268 and Lithomorphics (av = 0.5 g cm<sup>-3</sup>) in the second group and peats (ave 0.2 g cm<sup>-3</sup>) in  
269 the third group. All other properties were did not show effective differentiations  
270 among the soil types.

271 *Figure 1: Box plots showing the spread of each measured soil property for each of the*  
272 *major soil types from 304 individual soils sampled as part of a nationwide soil quality*  
273 *assessment in UK. The boundary of the box closest to zero indicates the 25<sup>th</sup>*  
274 *percentile, the line within the box marks the median (50<sup>th</sup> percentile), and the*  
275 *boundary of the box farthest from zero indicates the 75<sup>th</sup> percentile. Whiskers below*  
276 *and above the box indicate the 10<sup>th</sup> and 90<sup>th</sup> percentiles where outliers are present.*  
277 *GWG and SWG represent groundwater and surface water gley soils respectively.*

278

### 279 *3.2. Relationships among soil properties*

280 Correlation analysis of the 20 soil attributes representing soil biological,  
281 physical and chemical properties resulted in significant correlation ( $P < 0.05$ ) in 112  
282 of the 190 soil attribute pairs (Table 2). Of these, the highest significant ( $P < 0.01$ )  
283 positive correlations was between humic substances at 254 nm versus those at 400 nm  
284 ( $r = 0.97$ ). Other highly significant ( $P < 0.01$ ) positive correlations were between the

285 absorbance at 254 nm or 400 nm versus DOC ( $r = 0.78$  and  $r = 0.71$  respectively);  
286 leachate TON versus  $\text{NO}_3^-$  ( $r = 0.78$ ), and bulk density versus pH ( $r = 0.70$ ).  
287 Additional notable significant ( $P < 0.01$ ) positive correlations ( $r > 0.50$ ) were between:  
288 microbial-N versus microbial-C, SOC versus soil respiration, the leachate C:N ratio  
289 versus SOC, electrical conductivity versus both nitrate and TON, phenolics versus  
290 absorbance at 254 nm and DOC versus absorbance at 400 nm. The highest significant  
291 ( $P < 0.01$ ) negative correlation was between bulk density versus SOC ( $r = -0.83$ )  
292 Other notable significant ( $P < 0.01$ ) negative correlations were between: bulk density  
293 versus either microbial-C ( $r = -0.42$ ), soil respiration ( $r = -0.51$ ) or the leachate C:N  
294 ratio ( $r = -0.47$ ); SOC versus  $q\text{Mic}$  ( $r = -0.47$ ) and pH versus either SOC ( $r = -0.66$ ),  
295 absorbance at 400 nm ( $r = -0.42$ ), leachate DOC ( $r = -0.40$ ) or leachate C:N ratio ( $r =$   
296  $-0.47$ )

297 Table 2. Correlations among physical, chemical and biological soil attributes

298

| Variable           | qMic       | qCO2  | Mic C     | Mic N     | Mic CN   | SR        | SOC       | Nitrate   | Amonia    | pH        |
|--------------------|------------|-------|-----------|-----------|----------|-----------|-----------|-----------|-----------|-----------|
| <b>qMic</b>        | 1          |       |           |           |          |           |           |           |           |           |
| <b>qCO2</b>        | -0.07      | 1     |           |           |          |           |           |           |           |           |
| <b>Mic C</b>       | 0.23(**)   | -0.07 | 1         |           |          |           |           |           |           |           |
| <b>Mic N</b>       | 0.17(**)   | -0.05 | 0.63(**)  | 1         |          |           |           |           |           |           |
| <b>Mic CN</b>      | 0.18(**)   | -0.02 | 0.03      | -0.24(**) | 1        |           |           |           |           |           |
| <b>SR</b>          | -0.26(**)  | -0.01 | 0.31(**)  | 0.09      | -0.02    | 1         |           |           |           |           |
| <b>SOC</b>         | -0.47(**)  | -0.04 | 0.39(**)  | 0.09      | 0.04     | 0.61(**)  | 1         |           |           |           |
| <b>Nitrate</b>     | 0.21(**)   | -0.01 | -0.15(**) | -0.12(*)  | 0.20(**) | -0.22(**) | -0.33(**) | 1         |           |           |
| <b>Amonia</b>      | -0.05      | -0.04 | 0.08      | 0.06      | -0.03    | 0.02      | 0.04      | 0.06      | 1         |           |
| <b>pH</b>          | 0.35(**)   | 0.08  | -0.31(**) | 0         | -0.11(*) | -0.39(**) | -0.66(**) | 0.25(**)  | -0.18(**) | 1         |
| <b>Ec</b>          | 0.03       | 0.06  | -0.09     | 0.01      | 0.17(**) | -0.08     | -0.03     | 0.59(**)  | 0.03      | 0.12(*)   |
| <b>Phenols</b>     | -0.23(**)  | -0.01 | 0.19(**)  | 0.08      | -0.01    | 0.27(**)  | 0.39(**)  | -0.19(**) | 0.38(**)  | -0.36(**) |
| <b>Absb @ 254</b>  | -0.24(**)  | -0.01 | 0.10(*)   | -0.03     | 0.05     | 0.22(**)  | 0.34(**)  | -0.19(**) | 0.23(**)  | -0.42(**) |
| <b>Absb @ 400</b>  | -0.23(**)  | -0.01 | 0.10(*)   | -0.06     | 0.05     | 0.21(**)  | 0.35(**)  | -0.19(**) | 0.23(**)  | -0.42(**) |
| <b>HIX</b>         | 0.06       | 0.02  | 0         | 0.11(*)   | 0.13(**) | -0.07     | -0.14(**) | 0.24(**)  | 0.01      | 0.10(*)   |
| <b>amino acids</b> | -0.04      | -0.03 | 0.09      | -0.04     | 0.28(**) | 0.03      | 0.11(*)   | -0.02     | 0.48(**)  | -0.15(**) |
| <b>TOC_L</b>       | -0.20(**)  | 0.01  | 0.12(*)   | -0.02     | 0.06     | 0.29(**)  | 0.35(**)  | -0.18(**) | 0.32(**)  | -0.40(**) |
| <b>TON_L</b>       | 0.18(**)   | 0.02  | -0.08     | -0.05     | 0.24(**) | -0.14(**) | -0.21(**) | 0.78(**)  | 0.11 (*)  | 0.09      |
| <b>CN_L</b>        | -0.25 (**) | -0.04 | 0.16(**)  | -0.02     | 0.03     | 0.33(**)  | 0.50(**)  | -0.33(**) | -0.04     | -0.47(**) |
| <b>BD</b>          | 0.46(**)   | 0.05  | -0.42(**) | -0.22(**) | -0.07    | -0.51(**) | -0.83(**) | 0.35(**)  | -0.14(**) | 0.70(**)  |

299

300

**Table 2 continued**

301

| Variable           | Ec        | Phenols   | Absob @<br>254 | Absob @<br>400 | HIX       | amino<br>acids | TOC_L      | TON_L      | CN_L      | BD |
|--------------------|-----------|-----------|----------------|----------------|-----------|----------------|------------|------------|-----------|----|
| <b>Ec</b>          | 1         |           |                |                |           |                |            |            |           |    |
| <b>Phenols</b>     | 0.04      | 1         |                |                |           |                |            |            |           |    |
| <b>Absb @ 254</b>  | -0.04     | 0.58(**)  | 1              |                |           |                |            |            |           |    |
| <b>Absb @ 400</b>  | -0.08     | 0.60(**)  | 0.97(**)       | 1              |           |                |            |            |           |    |
| <b>HIX</b>         | 0.37(**)  | -0.09     | -0.04          | -0.22(**)      | 1         |                |            |            |           |    |
| <b>amino acids</b> | -0.01     | 0.23(**)  | 0.09           | 0.09           | 0.11(*)   | 1              |            |            |           |    |
| <b>TOC_L</b>       | 0.01      | 0.56(**)  | 0.78(**)       | 0.71(**)       | 0.08      | 0.23(**)       | 1          |            |           |    |
| <b>TON_L</b>       | 0.66 (**) | -0.08     | -0.13(**)      | -0.14(**)      | 0.31 (**) | 0.05           | -0.05      | 1          |           |    |
| <b>CN_L</b>        | -0.05     | 0.34(**)  | 0.38(**)       | 0.37(**)       | -0.06     | 0.02           | 0.38(**)   | -0.25 (**) | 1         |    |
| <b>BD</b>          | 0.10(*)   | -0.38(**) | -0.35 (**)     | -0.33 (**)     | 0.04      | -0.17 (**)     | -0.37 (**) | 0.21(**)   | -0.4 (**) | 1  |

302

303 **Note:** \*Correlation is significant at  $P < 0.05$  level, and \*\* at the  $P < 0.01$  level;  $q_{\text{Mic}}$ , microbial quotient;  $q_{\text{CO}_2}$ , metabolic quotient; Mic C,  
304 microbial carbon ( $\text{mg C kg}^{-1}$ ); Mic N, microbial nitrogen ( $\text{mg C kg}^{-1}$ ); Mic C:N, microbial C:N ratio; SR, soil respiration ( $\text{mg C kg}^{-1} \text{ h}^{-1}$ ); SOC,  
305 soil organic carbon ( $\text{mg C kg}^{-1}$ );  $\text{NO}_3^-$ , nitrate ( $\text{mg N l}^{-1}$ );  $\text{NH}_4^+$ , ammonium ( $\text{mg N l}^{-1}$ ); EC, ( $\mu\text{S cm}^{-1}$ ); Phenols, Soluble phenolics ( $\text{mg l}^{-1}$ ); Abs  
306 @ 254 and 400, absorbance of soil solution at 254 and 400 nm; HIX, humification index; Am acids, Free amino acids ( $\mu\text{M}$ ); TOC/N L, total  
307 organic carbon/nitrogen in leachate ( $\text{mg l}^{-1}$ ); BD, bulk density.

308 Due to differences in the units of individual variables, Factor Analysis (FA) was  
 309 performed using a correlation matrix on the standardised values of the measured 20 attributes.  
 310 The generalised least-squares method was used to extract factors because it is robust and requires  
 311 no assumptions of sample coming from a multivariate normal distribution (SPSS, 2006). The  
 312 first six factors with eigenvalues  $> 1$  were retained for interpretation, whilst factors with  
 313 eigenvalues  $< 1$  explained less total variation than individual soil attributes (Brejda et al., 2000).  
 314 The retained factors accounted for  $> 61\%$  of the total variance in the measured attributes; see  
 315 Table 3.

316  
 317 **Table 3.** Total variance (Eigenvalue), proportion and cumulative variance (Prop Var and Cum  
 318 Var) explained by factor analysis using correlation matrix (standardized data) on the measured  
 319 attributes.

| Factors  | Initial eigenvalues |                 |             | Extraction sums of squared loadings |                 |             | Rotation sum of squared loadings |                 |             |
|----------|---------------------|-----------------|-------------|-------------------------------------|-----------------|-------------|----------------------------------|-----------------|-------------|
|          | Total               | Prop of Var (%) | Cum Var (%) | Total                               | Prop of Var (%) | Cum Var (%) | Total                            | Prop of Var (%) | Cum Var (%) |
|          | Factor 1            | 5.31            | 26.6        | 26.6                                | 3.60            | 18.0        | 18.0                             | 3.35            | 16.7        |
| Factor 2 | 2.64                | 13.2            | 39.8        | 3.22                                | 16.1            | 34.1        | 2.96                             | 14.8            | 31.5        |
| Factor 3 | 2.03                | 10.1            | 49.9        | 2.14                                | 10.7            | 44.8        | 2.28                             | 11.4            | 42.9        |
| Factor 4 | 1.73                | 8.7             | 58.6        | 1.56                                | 7.8             | 52.6        | 1.65                             | 8.3             | 51.2        |
| Factor 5 | 1.31                | 6.6             | 65.1        | 0.65                                | 3.3             | 55.9        | 1.32                             | 6.6             | 57.8        |
| Factor 6 | 1.18                | 5.9             | 71.1        | 1.15                                | 5.7             | 61.6        | 0.76                             | 3.8             | 61.6        |

320  
 321 The retained factors were subjected to a varimax rotation. A varimax rotation  
 322 redistributes the variance of significant factors and minimizes the number of variables that have  
 323 high loadings on each factor, thereby simplifying the interpretation of the factors (SPSS, 2006).  
 324 The relative importance of each soil attribute, in terms of its contribution to all of the factors,



325 was judged by its communality value (Field, 2005; Ayoubi and Khormali, 2008) and is shown in  
326 Table 4. The six factors explained > 90% variance in absorbance @ 254 and 400 (absb@254 and  
327 400), microbial carbon (Mic C), and soil organic carbon (SOC); > 80% in total organic nitrogen  
328 in leachate (TON\_L) and bulk density (BD); > 70% in microbial nitrogen (Mic N), Nitrate,  
329 Ammonium, electrical conductivity (EC), and total organic carbon in leachate (TOC\_L); > 60 %  
330 in microbial quotient (*q*Mic), pH and humification index (HIX); > 50 % microbial C/N ratio  
331 (Mic CN), soil respiration (SR), and phenolics; and < 50 % C/N ratio of the leachate (CN\_L) and  
332 microbial metabolic quotient (*q*CO<sub>2</sub>) (Table 4). Attributes with the low communality estimates  
333 (e.g. *q*CO<sub>2</sub> and leachate C:N) were the least important for interpreting factors. The magnitudes of  
334 the loadings were used as a criterion for interpreting the relationship between the soil attributes  
335 and the factors. Soil attributes were assigned to the factor for which the loadings were highest.

336

337 **Table 4.** Proportion of variance (loadings) using varimax rotation and communality estimates  
 338 for soil attributes of the retained factors.

| Variable                 | Factor 1 | Factor 2 | Factor 3 | Factor 4 | Factor 5 | Factor 6 | Communality extraction |
|--------------------------|----------|----------|----------|----------|----------|----------|------------------------|
| <i>q</i> Mic             | -0.54    | -0.13    | 0.12     | 0.45     | -0.01    | -0.07    | 0.67                   |
| <i>q</i> CO <sub>2</sub> | 0.05     | -0.05    | -0.05    | -0.18    | 0.01     | 0.00     | 0.10                   |
| Microbial-C              | 0.29     | 0.03     | -0.04    | 0.89     | 0.09     | -0.03    | 0.90                   |
| Microbial-N              | 0.05     | -0.04    | -0.08    | 0.75     | -0.02    | 0.14     | 0.73                   |
| Microbial C:N            | 0.07     | 0.05     | 0.30     | -0.03    | 0.11     | 0.01     | 0.51                   |
| Soil respiration         | 0.61     | 0.06     | -0.07    | 0.09     | 0.03     | -0.06    | 0.50                   |
| Soil organic C           | 0.92     | 0.16     | -0.08    | 0.08     | 0.01     | -0.06    | 0.91                   |
| Nitrate-N                | -0.27    | -0.09    | 0.81     | -0.04    | 0.01     | 0.04     | 0.77                   |
| Ammonium-N               | 0.01     | 0.23     | 0.05     | 0.05     | 0.78     | 0.01     | 0.72                   |
| pH                       | -0.68    | -0.28    | 0.02     | -0.06    | -0.18    | 0.05     | 0.68                   |
| Elec. conductivity       | 0.03     | 0.00     | 0.74     | -0.03    | -0.05    | 0.22     | 0.70                   |
| Soluble phenolics        | 0.29     | 0.52     | -0.03    | 0.06     | 0.32     | -0.10    | 0.55                   |
| Absorb @ 254 nm          | 0.17     | 0.98     | -0.06    | -0.01    | 0.04     | 0.03     | 1.00                   |
| Absorb @ 400 nm          | 0.17     | 0.96     | -0.05    | -0.02    | 0.04     | -0.20    | 0.99                   |
| HIX                      | -0.06    | -0.06    | 0.25     | 0.07     | 0.05     | 0.76     | 0.69                   |
| Amino acids              | 0.11     | 0.06     | 0.02     | 0.01     | 0.66     | 0.05     | 0.56                   |
| TOC (leachate)           | 0.24     | 0.71     | -0.02    | 0.00     | 0.29     | 0.18     | 0.73                   |
| TON (leachate)           | -0.12    | -0.06    | 0.91     | 0.01     | 0.09     | 0.07     | 0.87                   |
| C:N (leachate)           | 0.47     | 0.26     | -0.17    | -0.02    | -0.06    | 0.02     | 0.42                   |
| Bulk density             | -0.86    | -0.19    | 0.13     | -0.18    | -0.11    | -0.05    | 0.87                   |

339

340 The **first factor** explained 16.7 % (see Table 3) of the total variance. It was named *soil*  
 341 *organic matter (SOM)* because it had high positive loading for SOC (0.92), soil respiration (0.61)  
 342 and leachate C:N ratio (47), a high negative loadings for bulk density (-0.86), pH (-0.68) and  
 343 moderately on *q*Mic (-0.54). Grouping *q*Mic with the *SOM* factor rather than factor 4 was as a  
 344 result of its stronger correlation with attributes constituting the *SOM* factor namely, soil

345 respiration ( $r = -0.26$ ), SOC ( $r = -0.47$ ) and bulk density ( $r = 0.46$ ) rather than with Microbial-C  
346 ( $r = 0.23$ ) and Microbial-N ( $r = 0.17$ ) of factor 4 (Table 3). **The second factor** explained 15% of  
347 the total variance with a high positive loading for soluble phenolics (0.52), leachate absorbance  
348 at 254 nm (0.98), 400 nm (0.96) and leachate TOC (0.71) and consequently, was termed *OM*  
349 *humification*. The **third factor** explained 11 % of the total variance with high positive loadings  
350 for nitrate (0.81), leachate TON (0.91) and electrical conductivity (0.74) and was therefore  
351 termed *soluble nitrogen* factor. The **fourth factor** had positive loadings for Microbial-C (0.89),  
352 Microbial-N (0.75) and a moderately high loading for *qMic* (0.45), and was termed *microbial*  
353 *biomass*. The **fifth factor** had positive loading for ammonium (0.78) and amino acids (0.66) and  
354 was termed *reduced N*. **The sixth factor** explained only 4 % of the total variance and had a high  
355 positive loading for HIX (0.76) and was termed *soil humification index*.

356

### 357 3.3. Effect of soil types on attribute means and factor scores

358 One way ANOVA revealed that most of the soil attributes and factor scores varied  
359 significantly with soil types (Table 5). However, pairwise comparison showed that the effect of  
360 soil types on most attribute was very small. In most cases, only the Peat soils were clearly  
361 significantly ( $P < 0.01$ ) different from all the other soil types. Only *SOM* and *microbial biomass*  
362 factors (Factors 1 and 4 respectively) varied significantly ( $P < 0.05$ ) with soil type. *SOM* factor  
363 mean scores were negative for Brown, GWG, SWG and Pelosol soils and positive for  
364 Lithomorphic, Peat and Podzolic soils. Peats had the highest score and were significantly  
365 different from all other soil types on the *SOM* factor. Furthermore, Peat soils had the highest  
366 SOC content to which the analysis also confirmed. The mean scores for *SOM* factor did not vary  
367 significantly ( $p > 0.05$ ) within Browns, GWGs and Pelosols nor did it do so among the

368 Lithomorphic, Podzolic and SWG soils. The *Microbial biomass* factor varied significantly ( $P <$   
369  $0.05$ ) between Brown versus GWG soil types and Lithomorphics only. Mean scores for *OM*  
370 *humification*, *soluble N*, *reduced N* and *humification index* did not vary significantly ( $P > 0.05$ )  
371 among all soil types.

372 **Table 5.** Soil attribute means and factor scores in the different soil types (The first 5 variables are the most important for  
 373 discrimination between soil types)

| Soil attributes                                         | Soil types           |                    |                     |                    |                      |                    |                     | SEM   | ANOVA |
|---------------------------------------------------------|----------------------|--------------------|---------------------|--------------------|----------------------|--------------------|---------------------|-------|-------|
|                                                         | Brown                | Groundwater gley   | Lithomorphic        | Peat               | Pelosols             | Podzolic           | Surface water gley  |       |       |
| Microbial quotient                                      | 0.018 <sup>a</sup>   | 0.026 <sup>a</sup> | 0.014 <sup>ac</sup> | 0.003 <sup>b</sup> | 0.014 <sup>abc</sup> | 0.010 <sup>c</sup> | 0.018 <sup>a</sup>  | 0.003 | 0.00  |
| $q\text{CO}_2$                                          | 0.073                | 0.002              | 0.001               | 0.011              | 0.01                 | 0.002              | 0.003               | 0.012 | NS    |
| Microbial-C (g kg <sup>-1</sup> )                       | 0.59 <sup>a</sup>    | 1.00 <sup>ab</sup> | 1.03 <sup>ab</sup>  | 1.37 <sup>b</sup>  | 0.54 <sup>a</sup>    | 1.02 <sup>ab</sup> | 0.89 <sup>ab</sup>  | 0.13  | 0.00  |
| Microbial-N (mg kg <sup>-1</sup> )                      | 85 <sup>a</sup>      | 119 <sup>ab</sup>  | 148 <sup>b</sup>    | 113 <sup>ab</sup>  | 71 <sup>ab</sup>     | 111 <sup>ab</sup>  | 99 <sup>ab</sup>    | 16    | 0.03  |
| C:N (Microbial)                                         | 12.4                 | 19.6               | 18.9                | 19.7               | 36.3                 | 29.9               | 33.2                | 12    | NS    |
| Soil respiration (mg kg <sup>-1</sup> h <sup>-1</sup> ) | 0.63 <sup>a</sup>    | 1.10 <sup>a</sup>  | 0.93 <sup>a</sup>   | 3.35 <sup>b</sup>  | 1.63 <sup>ab</sup>   | 1.58 <sup>ab</sup> | 1.18 <sup>a</sup>   | 0.45  | 0.00  |
| Soil organic C (g kg <sup>-1</sup> )                    | 42 <sup>a</sup>      | 45 <sup>a</sup>    | 132 <sup>b</sup>    | 377 <sup>c</sup>   | 92 <sup>ab</sup>     | 151 <sup>b</sup>   | 98 <sup>b</sup>     | 23    | 0.00  |
| Nitrate (mg N l <sup>-1</sup> )                         | 3.00 <sup>a</sup>    | 2.04 <sup>ac</sup> | 2.32 <sup>ac</sup>  | 0.13 <sup>b</sup>  | 1.13 <sup>c</sup>    | 0.37 <sup>bc</sup> | 3.08 <sup>a</sup>   | 0.39  | 0.00  |
| Ammonium (mg N l <sup>-1</sup> )                        | 0.25                 | 0.18               | 0.3                 | 0.27               | 0.17                 | 0.31               | 0.3                 | 0.05  | NS    |
| pH                                                      | 6.55 <sup>a</sup>    | 6.56 <sup>a</sup>  | 6.24 <sup>ac</sup>  | 4.71 <sup>b</sup>  | 6.18 <sup>ac</sup>   | 5.08 <sup>b</sup>  | 5.73 <sup>c</sup>   | 0.2   | 0.00  |
| Elect. conductivity (μS cm <sup>-1</sup> )              | 129                  | 107                | 124                 | 99                 | 74                   | 81                 | 116                 | 16    | NS    |
| Soluble phenols (mg l <sup>-1</sup> )                   | 0.33 <sup>ac</sup>   | 0.26 <sup>a</sup>  | 0.68 <sup>bc</sup>  | 1.10 <sup>b</sup>  | 0.56 <sup>abc</sup>  | 1.20 <sup>b</sup>  | 0.46 <sup>c</sup>   | 0.16  | 0.00  |
| Absorbance @ 254 nm                                     | 0.25 <sup>a</sup>    | 0.28 <sup>a</sup>  | 0.29 <sup>ab</sup>  | 0.47 <sup>b</sup>  | 0.45 <sup>ab</sup>   | 0.48 <sup>b</sup>  | 0.32 <sup>ab</sup>  | 0.48  | 0.00  |
| Absorbance @ 400 nm                                     | 0.028 <sup>a</sup>   | 0.033 <sup>a</sup> | 0.032 <sup>ab</sup> | 0.061 <sup>b</sup> | 0.047 <sup>ab</sup>  | 0.061 <sup>b</sup> | 0.036 <sup>ab</sup> | 0.009 | 0.00  |
| Humification index (HIX)                                | 9.0 <sup>ab</sup>    | 9.0 <sup>ab</sup>  | 8.7 <sup>ab</sup>   | 8.2 <sup>a</sup>   | 8.3 <sup>ab</sup>    | 8.6 <sup>ab</sup>  | 9.3 <sup>b</sup>    | 0.3   | 0.03  |
| Amino acids (μM)                                        | 1.52                 | 1.83               | 1.67                | 1.95               | 1.15                 | 3.1                | 2.08                | 0.4   | NS    |
| Leachate TOC (mg l <sup>-1</sup> )                      | 7.5 <sup>a</sup>     | 6.9 <sup>a</sup>   | 8.2 <sup>ab</sup>   | 12.0 <sup>b</sup>  | 12.8 <sup>ab</sup>   | 12.3 <sup>b</sup>  | 9.8 <sup>ab</sup>   | 2.2   | 0.00  |
| Leachate TON (mg l <sup>-1</sup> )                      | 5.82 <sup>a</sup>    | 3.47 <sup>ac</sup> | 3.16 <sup>ac</sup>  | 0.78 <sup>b</sup>  | 1.62 <sup>c</sup>    | 1.81 <sup>bc</sup> | 6.69 <sup>a</sup>   | 0.8   | 0.01  |
| Leachate C:N                                            | 4.6 <sup>a</sup>     | 5.5 <sup>a</sup>   | 7.2 <sup>a</sup>    | 19.0 <sup>b</sup>  | 9.1 <sup>ab</sup>    | 17.5 <sup>b</sup>  | 9.7 <sup>a</sup>    | 2.4   | 0.00  |
| Bulk density                                            | 1.10 <sup>a</sup>    | 1.11 <sup>a</sup>  | 0.63 <sup>b</sup>   | 0.19 <sup>c</sup>  | 1.08 <sup>a</sup>    | 0.58 <sup>b</sup>  | 0.81 <sup>b</sup>   | 0.06  | 0.00  |
| <b>Factors</b>                                          | <b>Factor scores</b> |                    |                     |                    |                      |                    |                     |       |       |
| Factor 1                                                | -0.52 <sup>a</sup>   | -0.63 <sup>a</sup> | 0.15 <sup>b</sup>   | 1.58 <sup>c</sup>  | -0.59 <sup>a</sup>   | 0.2 <sup>b</sup>   | -0.07 <sup>b</sup>  | 0.12  | 0     |
| Factor 2                                                | -0.17                | -0.05              | -0.13               | 0.22               | -0.46                | 0.44               | 0                   | 0.15  | NS    |
| Factor 3                                                | 0.09                 | -0.1               | -0.06               | -0.13              | -0.4                 | -0.28              | 0.23                | 0.11  | NS    |
| Factor 4                                                | -0.24 <sup>a</sup>   | 0.36 <sup>b</sup>  | 0.30 <sup>b</sup>   | 0.03 <sup>ab</sup> | -0.21 <sup>ab</sup>  | 0.01 <sup>ab</sup> | 0.02 <sup>ab</sup>  | 0.19  | 0.04  |
| Factor 5                                                | -0.05                | -0.22              | -0.03               | -0.11              | -0.2                 | 0.36               | 0.14                | 0.17  | NS    |
| Factor 6                                                | 0.06                 | -0.1               | 0.17                | -0.3               | -0.29                | -0.2               | 0.23                | 0.18  | NS    |

375 3.4. Soil quality indicators across soil types

376 Discriminant analysis of the six statistical factors in relation to soil types, indicated that the  
377 *SOM* was the most powerful in discriminating among the seven soil type groups based on the  
378 magnitude of their discriminant coefficients (Eq. 2). The first canonical discriminant function  
379 explained 90 % of the total variance based on Wilks's Lambda, ( $P < 0.001$ ) (table not shown)  
380 and therefore was the most important canonical discriminant function for discriminating soil  
381 types using the soil quality factors identified. Although the second canonical discriminant  
382 function was also significant ( $P = 0.03$ ) based on Wilks's Lambda, it only accounted for 4 % of  
383 the total variance and therefore was not used.

$$384 \quad Y_1 = 1.43 (SOM) + 0.29 (OM \text{ humification}) - 0.14 (soluble N) + 0.08 (microbial \\ 385 \quad biomass) + 0.03 (reduced N) - 0.22 (HIX) \quad (\text{Eq. 2})$$

386 Therefore the group differences across soil types shown by ANOVA can be explained in  
387 terms of *SOM*, judging from the discriminant coefficient which was five-fold larger than the  
388 coefficient for the *OM humification* factor and several fold greater than the rest of the factors.  
389 Discriminant analysis of the measured attributes constituting *SOM* (i.e. *qMic*, soil respiration  
390 (SR), soil organic C (SOC), pH and bulk density (BD)) indicated that microbial quotient (*qMic*)  
391 was the most powerful attribute discriminating the soil types (Eq. 3).

$$392 \quad Y_2 = 8.75 \times 10^{-6} (SOC) - 1.99 (qMic) - 0.50 (BD) - 0.04 (pH) - 0.05 (SR) \quad (\text{Eq. 3})$$

393 The discriminant coefficient for *qMic* was four-fold larger than the coefficient for bulk  
394 density and more than 40-fold for the rest. The *qMic* was significantly correlated with bulk  
395 density (0.46\*\*), soil organic C (-0.47\*\*), pH (0.35\*\*) and soil respiration (-0.26\*\*) while bulk  
396 density was significantly correlated with soil organic C (-0.83\*\*), pH (0.70\*\*) and soil  
397 respiration (-0.53\*\*) meaning that *qMic* and bulk density, though correlated, were the most

398 important and dominant attributes for assessing soil quality across soil types. The mean  
399 comparisons using the Games-Howell approach indicated that the bulk density had similar  
400 discriminating power as the *SOM* factor among the soil types. *qMic* mean values varied  
401 significantly with soil types separating Peat < Podzols < Browns, GWGs and SWGs soils in  
402 increasing order (Table 5).

403

### 404 3.5. Effect of aggregate vegetation class on factor scores

405 Aggregate vegetation class (AVC) showed more effects on factor scores than the soil types.  
406 The significant effects were observed in *SOM*, *OM humification*, *microbial biomass* and  
407 *humification index*. The *soluble N* and *reduced N* factors showed no significant variation among  
408 the AVCs (Table 6). The *SOM* factor had the highest factor scores ( $P < 0.001$ ) in Heath and Bog.  
409 Mean scores between Moorland Grass Mosaics and Upland Woodland did not vary significantly  
410 ( $P > 0.05$ ); nor among Fertile Grasslands, Infertile Grassland, Lowland Woodland and Tall Grass  
411 Mosaic. The mean scores were lowest in Crop and Weeds and were significantly different ( $P <$   
412  $0.001$ ) from all other AVCs except in Tall Grass and Herbs.

413 **Table 6.** Effect of Aggregate Vegetation Class (AVC) on factor scores and soil attribute means.

| <b>Average vegetation class mean factor scores</b> |                                          |                     |                     |                     |                     |                        |                     |                     |       |       |
|----------------------------------------------------|------------------------------------------|---------------------|---------------------|---------------------|---------------------|------------------------|---------------------|---------------------|-------|-------|
| <b>Factors</b>                                     | Crops & weeds                            | Fertile grasslands  | Heath & bog         | Infertile grassland | Lowland woodland    | Moorland grass mosaics | Tall grass & herbs  | Upland woodland     | SEM   | ANOVA |
| <b>Factor 1</b>                                    | -0.80 <sup>a</sup>                       | -0.54 <sup>b</sup>  | 1.43 <sup>c</sup>   | -0.50 <sup>b</sup>  | -0.40 <sup>b</sup>  | 0.62 <sup>d</sup>      | -0.64 <sup>ab</sup> | 0.20 <sup>bd</sup>  | 0.10  | 0.00  |
| <b>Factor 2</b>                                    | -0.40 <sup>a</sup>                       | -0.11 <sup>ab</sup> | 0.30 <sup>b</sup>   | 0.02 <sup>b</sup>   | 0.41 <sup>ab</sup>  | -0.11 <sup>ab</sup>    | -0.06 <sup>ab</sup> | 0.51 <sup>ab</sup>  | 0.19  | 0.00  |
| <b>Factor 3</b>                                    | 0.34                                     | 0.07                | -0.09               | -0.03               | 0.05                | -0.34                  | 0.12                | -0.28               | 0.14  | NS    |
| <b>Factor 4</b>                                    | -0.49 <sup>a</sup>                       | 0.16 <sup>b</sup>   | 0.07 <sup>b</sup>   | 0.27 <sup>b</sup>   | -0.19 <sup>ab</sup> | 0.28 <sup>b</sup>      | -0.61 <sup>a</sup>  | -0.21 <sup>ab</sup> | 0.16  | 0.00  |
| <b>Factor 5</b>                                    | -0.39                                    | 0.09                | 0.13                | 0.02                | -0.12               | 0.22                   | -0.20               | 0.18                | 0.14  | NS    |
| <b>Factor 6</b>                                    | -0.29 <sup>a</sup>                       | 0.04 <sup>ab</sup>  | -0.35 <sup>ab</sup> | 0.13 <sup>b</sup>   | 1.15 <sup>c</sup>   | 0.18 <sup>b</sup>      | 0.38 <sup>bc</sup>  | 0.63 <sup>bc</sup>  | 0.17  | 0.00  |
| <b><u>Soil</u></b>                                 |                                          |                     |                     |                     |                     |                        |                     |                     |       |       |
| <b><u>attributes</u></b>                           | <b><u>Soil attribute mean values</u></b> |                     |                     |                     |                     |                        |                     |                     |       |       |
| <b>Soil respiration</b>                            | 0.29 <sup>a</sup>                        | 1.00 <sup>b</sup>   | 3.22 <sup>c</sup>   | 0.77 <sup>b</sup>   | 0.67 <sup>ab</sup>  | 1.44 <sup>b</sup>      | 0.43 <sup>ab</sup>  | 1.41 <sup>b</sup>   | 0.23  | 0.000 |
| <b>Soil organic C</b>                              | 16.7 <sup>a</sup>                        | 43.6 <sup>b</sup>   | 350.2 <sup>c</sup>  | 43.8 <sup>b</sup>   | 46.4 <sup>b</sup>   | 185.6 <sup>c</sup>     | 25.0 <sup>ab</sup>  | 119.8 <sup>c</sup>  | 11.2  | 0.000 |
| <b>pH</b>                                          | 7.3 <sup>a</sup>                         | 6.4 <sup>b</sup>    | 4.6 <sup>c</sup>    | 6.3 <sup>b</sup>    | 6.2 <sup>abd</sup>  | 5.2 <sup>d</sup>       | 6.6 <sup>ab</sup>   | 4.7 <sup>dc</sup>   | 0.2   | 0.000 |
| <b>Bulk density</b>                                | 1.37 <sup>a</sup>                        | 1.06 <sup>b</sup>   | 0.21 <sup>c</sup>   | 0.95 <sup>b</sup>   | 0.89 <sup>b</sup>   | 0.41 <sup>d</sup>      | 1.22 <sup>ab</sup>  | 0.48 <sup>d</sup>   | 0.05  | 0.000 |
| <b>qMic</b>                                        | 0.021 <sup>a</sup>                       | 0.023 <sup>a</sup>  | 0.005 <sup>b</sup>  | 0.021 <sup>a</sup>  | 0.015 <sup>ab</sup> | 0.009 <sup>b</sup>     | 0.015 <sup>ab</sup> | 0.010 <sup>ab</sup> | 0.003 | 0.000 |

414



415

416 Means scores for *OM humification* factor varied significantly ( $P < 0.001$ ) between Crop  
417 and Weeds verses Herb and Bog, and Infertile Grasslands; all other pairs did not vary  
418 significantly. For *microbial biomass* factor, Crop and Weeds and Tall Grass and Herbs varied  
419 significantly ( $P < 0.001$ ) against the Fertile Grassland, Infertile Grasslands, Heath and Bog, and  
420 Moorland Grass Mosaics, while all other pairs were not significantly different ( $P > 0.05$ ). The  
421 *humification index* factor showed that the mean scores varied significantly ( $P < 0.001$ ) among  
422 Crop and Weeds versus Infertile Grassland and Moorland Grass Mosaics versus Lowland  
423 Woodland only.

424

### 425 3.6. Soil quality indicators across Aggregate Vegetation Classes (AVC)

426 The first canonical discriminant function of the discriminant analysis of the six factors  
427 across the AVCs explained 94% of the total variance (Wilks's Lambda,  $P < 0.001$ ) whose  
428 coefficients were used in the equation below:

$$429 \quad Y_3 = 2.12 (SOM) + 0.49 (OM \text{ humification}) - 0.35 (soluble N) + 0.30 (microbial biomass) \\ 430 \quad + 0.36 (reduced N) - 0.20 (soil HIX) \quad \quad \quad (Eq. 4)$$

431 From the discriminant coefficients in Eq. [4], *SOM* factor was the most powerful  
432 discriminating among the eight different AVCs. The *SOM* factor was more than four-fold larger  
433 than the coefficients of all others soil quality factors under consideration.

434 The discriminant analysis of the measured attributes constituting the *SOM* factor showed that BD  
435 and *qMic* were the most powerful discriminating soil attributes among the seven habitats (AVCs)  
436 (Eq. 5).

437  $Y_4 = 3.27$  (bulk density)  $- 2.45$  (qMic)  $- 2.75 \times 10^{-6}$  (soil organic C)  $+ 0.70$  (pH)  $+ 0.08$   
 438 (soil respiration) (Eq. 5)

439 Bulk density possessed similar discriminating power as the *SOM* factor among the AVCs.  
 440 Bulk density values were significantly different ( $P < 0.001$ ) among AVCs with the lowest mean  
 441 values in Heath and Bog ( $0.21 \text{ g cm}^{-3}$ )  $<$  Upland Wooded ( $0.48 \text{ g cm}^{-3}$ ) and Moorland Grass  
 442 Mosaic ( $0.41 \text{ g cm}^{-3}$ )  $<$  Fertile Grass ( $1.06 \text{ g cm}^{-3}$ ), Infertile Grass ( $0.95 \text{ g cm}^{-3}$ ), Lowland  
 443 Wooded ( $0.89 \text{ g cm}^{-3}$ )  $<$  Tall Grass and Herbs ( $1.21 \text{ g cm}^{-3}$ ) and Crop and Weeds ( $1.37 \text{ g cm}^{-3}$ ;  
 444 Table 6).

445  
 446 *3.7. Main and interactions effect of soil types and AVCs*

447 The results of the two-way ANOVA on the first canonical discriminate function on all 20  
 448 variables showed significant ( $P < 0.01$ ) main and interaction effects. The main effect of soil  
 449 types and the effect of soil types \* AVCs interaction on the attribute's scores was very small  
 450 (Partial Eta Square = 0.09 and 0.16 respectively), while the main effect of the AVCs was large  
 451 (Partial Eta Square = 0.42; Table. 7).

452 **Table 7.** Tests of between-subjects effects;  
 453

| Source                      | Type IV sum of squares | Df        | Mean Square  | F            | Sig.         | Partial eta squared |
|-----------------------------|------------------------|-----------|--------------|--------------|--------------|---------------------|
| Corrected model             | 553.14                 | 38        | 14.56        | 36.36        | 0.001        | 0.844               |
| Intercept                   | 3.42                   | 1         | 3.416        | 8.532        | 0.004        | 0.032               |
| <b>Soil Type * AVC_Desc</b> | <b>18.98</b>           | <b>25</b> | <b>0.759</b> | <b>1.896</b> | <b>0.008</b> | <b>0.157</b>        |
| <b>Soil Type</b>            | <b>10.36</b>           | <b>6</b>  | <b>1.726</b> | <b>4.311</b> | <b>0.001</b> | <b>0.092</b>        |
| <b>AVC_Desc</b>             | <b>73.97</b>           | <b>7</b>  | <b>10.57</b> | <b>26.39</b> | <b>0.001</b> | <b>0.420</b>        |
| Error                       | 102.09                 | 255       | 0.400        |              |              |                     |
| Total                       | 655.24                 | 294       |              |              |              |                     |
| Corrected Total             | 655.24                 | 293       |              |              |              |                     |

454

455 *Notes: Dependent variable: 1st Canonical Discriminant function scores from of all the soil*  
456 *attributes measured. AVC\_desc means AVC description; Soil Type\*AVC\_Desc means the*  
457 *interaction between the soil type and AVC effects.*

458

459 The cross tabulation of AVCs versus soil types (Table S3), showed that 27 out of 56  
460 combinations or cells, the soil types were sampled less than the calculated expected counts in the  
461 AVCs. In 16 combinations, the soil types were not at all represented in the AVCs. The most  
462 affected were the Lowland Woodland and Tall Grass and Herbs where, only Brown and SWGs  
463 were samples in the former and only Browns, GWG and SWGs in the latter.

464

#### 465 **4. Discussion**

##### 466 *4.1. Effect of soil types and AVCs on the soil quality factors and/or indicators*

467 A set of 20 correlated soil attributes were grouped into six factors called soil quality  
468 factors, using factor analysis. The factors identified contribute to one or more key soil functions  
469 proposed by Larson and Pierce (1991) and therefore could be considered soil quality indicators  
470 (Brejda et al., 2000). Since the soil quality factors cannot be measured directly (Elliott, 1997;  
471 Brejda et al., 2000), the effect of soil types and the AVCs on these factors were inferred by  
472 monitoring soil attributes that comprised them.

473 Not all the soil quality factors varied significantly with soil types or with AVCs. Only  
474 *SOM* and *microbial biomass* factors varied significantly ( $P < 0.001$ ) by soil types. *SOM* was able  
475 to discriminate the highest number of soil groups, separating the Peats (1) with the highest  
476 scores, from Lithomorphics, Podzols, and SWGs (2) with intermediate scores, and from Browns,  
477 GWGs and Pelosols (3) with the lowest scores (Fig. 5), thus rendering three distinct soil type

478 groupings. The *microbial biomass* factor had a minor effect, discriminating the Browns from  
479 GWGs and Lithomorphics only. The soil attributes constituting these soil quality factors (Soil  
480 respiration, SOC, pH, bulk density,  $q_{\text{Mic}}$ , Microbial-C and -N) showed significant ( $P < 0.01$ )  
481 variations discriminating at most three groups of soil types. In all the attributes considered,  
482 Browns, GWGs and Pelosols were grouped together. *SOM* factor, SOC and bulk density  
483 attributes separated the Peats as a unique soil group from all other soil types, which is not  
484 entirely a surprising result, since the peats are highly organic in nature with low BD as opposed  
485 to mineral soils with low OM content and higher bulk densities. The most important soil quality  
486 indicator associated with specific soil types or groups was the *SOM* factor with  $q_{\text{Mic}} >$  bulk  
487 density as the most important attributes.

488 Similarly, the most important SQF differentiating the AVCs across the GB was *SOM*  
489 factor with bulk density  $>$   $q_{\text{Mic}}$  attributes being the most important attributes. Four distinct AVC  
490 groups were separated based on *SOM* factor and BD. Heath and bog was exclusively separated as  
491 one group (1). Other groups were: (2) Crop and weeds with Tall grass and herb; (3) Fertile  
492 grassland, Infertile grassland, Lowland woodland, Tall grass and herbs, and Upland woodland;  
493 (4) Moorland grassland mosaic with Upland woodland. The Upland woodland and Tall grass and  
494 herbs were intermediate habitats classifying in more than one of these groups. The rest of the  
495 factors and attributes discriminated three or less groups. The soil attributes were generally better  
496 in discriminating the AVCs than the SQF (Table 6)

497 Since  $q_{\text{Mic}}$  and bulk density were moderately correlated ( $r=0.46^{**}$ ), they may be  
498 redundant as indicators to be used together. If only one attribute were to be used to monitor soil  
499 quality in soil types and AVCs,  $q_{\text{Mic}}$  and BD respectively seems to offers the greatest potential  
500 judging from their high weights on the respective prediction models. However the  $q_{\text{Mic}}$  may be

501 a ‘MUST be included’ soil attribute in the minimum data set, due to its important role in several  
502 soil functions, being a fraction of soil carbon. Soil C influences a wide range of soil functions  
503 including bulk density, infiltration, pesticide buffering, aeration, aggregate formation, pH, buffer  
504 capacity, cation-exchange properties, mineralization, and the activity of soil organisms (Larson  
505 and Pierce, 1991; Seybold et al., 1997). However, since the measurement of bulk density is  
506 reasonably easy to obtain, it is therefore reasonable to consider it together with SOC, microbial  
507 and biomass C as minimum data set for assessing soil quality across average vegetation classes  
508 in the study area.

509 Pedogenesis has taken place over thousands of years in the UK. During this period there  
510 has been a range of climate change related vegetation colonization phases starting from tundra  
511 heath and cycling through a range of forest types (Fitzpatrick, 1980). During this period parent  
512 material/topography, climate and vegetation would have been stable for long periods of time  
513 leading to the differentiation of soils. This was followed by progressive forest clearance which  
514 started approximately 1000-3000 years ago with vegetation cover becoming more grassland and  
515 heathland dominated. The last 200 years, however, has seen intense management of these soils  
516 with the addition of fertilisers, lime and organic wastes combined with mechanical mixing of the  
517 soils which has reversed centuries of acidification and soil horizon development. This  
518 homogenisation of the soil has led to shifts between soil types even over short timescales (e.g.  
519 humic-podzolic to brown soils on improved upland grasslands) and the loss of peat soils in  
520 intensive agricultural areas (e.g. East Anglia; Taft et al., 2018). One key question is therefore  
521 whether it is historical soil type or current vegetation that is more important in driving soil  
522 processes in the short term (e.g. over a 10-25 year timescale)? Here we found that more soil  
523 quality factors showed an AVC effect rather than a soil type effect. All soil quality factors varied

524 significantly ( $P < 0.01$ ) by AVCs except *soluble N* and *reduced N* factors though none  
525 discriminated more than four groups. It is possible that some of the soil quality factors that were  
526 insensitive to vegetation may represent inherent soil qualities that are controlled by other key  
527 factors of soil formation (e.g. parent material/topography), while those which significantly varied  
528 by AVCs may represent dynamic soil qualities, possessing great potential for assessing  
529 management practices on soil quality (Jenny, 1994; Soybold et al., 1997; Brejda et al., 2000;  
530 Bünemann, et al., 2018).

531 Most indicators available in literature have not been validated nor their sensitivity tested  
532 in a wide range of situations (Velasquez et al., 2007). Some of the attributes measured and the  
533 soil quality indicators identified in this work are not usually used in the monitoring of soil  
534 quality, but are candidates for potential alternatives (Schloter, et al., 2018).

535

#### 536 4.2. Prediction of SQF and SQI by soil type or AVC

537 The clusters from multivariate classification are “natural” groups, which uses the  
538 “minimum-variance” solution; where a population is partitioned into cluster subsets by  
539 minimizing the total within group variation while maximising between groups variance (Wishart,  
540 1968). The groups/cluster formed from the multivariate analysis need to have no significant  
541 overall spread. The clusters therefore, should correspond to data modes (distinct modes).  
542 However, most of our cluster modes defined by soil types were not always distinct. Most of them  
543 were separated from each other by significant “noise” data, making it impossible to resolve all  
544 the clusters. Thus, the definition of the reference values for each soil type or AVC was  
545 ambiguous, since most soils types or AVC groups could not be differentiated (Fig. 2). Forming,  
546 describing and defining the groups could involve the use all measured attributes even though

547 only a few could be differentiating (Soil Survey Staff, 1999). Even when the soil quality  
548 factors/indicators and attributes were used in combination, some groups/clusters could still not  
549 be resolved. Therefore, the soil quality indicators and attributes identified in this study can only  
550 be used to characterise soil types and AVCs groups rather than for prediction or classification.  
551 From the discriminant plots and the dendrogram in Fig. 3 three groups can be defined in soil  
552 types and four groups in the AVC.

553  
554 **Figure 2.** *Discrimination plots showing 95% confidence circles around the means for soil types*  
555 *(Panel A) and AVCs (Panel C). Panels B and D are the respective cluster analyses dendrograms*  
556 *using a complete linkage method.*

557  
558 Defining differentiating criteria for these groups in the soil types could involve the use of  
559 bulk density attribute to define unique property ranges for the first groups, a combination of soil  
560 respiration and SOC attributes for the second group, and a combination of  $q_{Mic}$ , soil respiration,  
561 SOC, pH and bulk density attributes for the third group. The Pelosols were the most dispersed  
562 and unreliable group for the purpose of attribute membership prediction, probably due to the fact  
563 that they were under sampled, considering that only six samples were included in the analysis.  
564 The classification of the AVCs using discriminate and cluster analyses on key attributes yielded  
565 four clusters. Defining differentiating criteria for these groups could involve the use of a  
566 combination of soil respiration, SOC, pH attributes to define property ranges for the first, second  
567 and fourth groups and bulk density attribute for the third group. Tall Grass and Herbs and  
568 Lowland Wooded were under sampled (with 11 and 6 samples respectively; Table S3) which

569 greatly compromised their predictive accuracy as can be observed from the large 95%  
570 confidence circles which overlapped with other AVC groups.

571

#### 572 4.3. To what extent do soil types and/ or AVC act as major regulators of SQI?

573 The two-way ANOVA and the tests of between-subjects effects on the first canonical  
574 discriminant (CD) function from the canonical discriminant analysis (CDA) of the 20 physical,  
575 chemical and biological properties showed significant differences between groups (soil types and  
576 AVCs) as well as significant differences in the effect of soil type on the soil attributes between  
577 the AVC (significant interaction of soil type  $\times$  AVC; Table 7). The ‘practical’ significance of  
578 each term from Partial Eta Square values indicates that AVCs (with a large Partial Eta Square =  
579 0.42), were a better regulator of the SQIs than soil types (with a weak Partial Eta Square = 0.09).  
580 The effect size for the interaction was equally relatively weak (Partial Eta Square = 0.16). The  
581 conclusion of the significant ( $P < 0.01$ ) interaction effect of soil type  $\times$  AVC is that the soil type  
582 differences in the first CD function (or attributes) partly depended on the AVCs where the soil  
583 was sampled. A multiple comparison of all soil type groups with AVC groups would be required  
584 to draw specific conclusions regarding the interaction effects, which is quite complex and is  
585 beyond the scope of this thesis. Suffice to say that there was a partial and varied soil type  $\times$  AVC  
586 interaction across all levels. These interactions confirm Jenny’s (1994) theory that the biotic  
587 factor (of which vegetation plays a major role) is amongst others an important soil forming  
588 factor. However, the results from the cross tabulation indicated that not all soil types were well  
589 represented in the AVCs in going by the calculated expected counts. In some cases soil types  
590 were not at all represented (See Table S3). This problem can contribute to the complexity and  
591 accuracy in the interpretation of the interaction effect observed above.



592

## 593 **5. Conclusions**

594           The dominant SQFs/Is and attributes varied by both soil type and AVC. The *SOM* factor  
595 was the most discriminating factor for both soil types and AVCs with microbial quotient and  
596 bulk density as the most discriminating measured attributes. The discriminant analysis on the  
597 important measured attributes comprising the *SOM* factor produced three fairly homogenous  
598 groups for soil types and four groups for AVCs. It was however, impossible to define reference  
599 values in the SQF/I or attributes for separate individual soil types or AVCs, as property ranges  
600 greatly overlapped due to large between group variability (probably due to integrating large  
601 spatial areas). Some of the differences observed in soil types with regard to soil attributes were in  
602 part dependent on the AVCs differences.

603           Therefore, whether SQIs can be predicted by soil types remains an open question. This  
604 study has shown that soil types or AVCs are poor predictors for SQF and indicators derived from  
605 factor analysis. However, different sets of SQIs and attributes for different regions have been  
606 used in the past in different studies (e.g. Brejda et al., 2000a; Brejda et al., 2000b; Shukla et al.,  
607 2006; Valesquez et al., 2007; Ayoubi and Khormali, 2008) suggesting that there may not be a  
608 universal optimum set of indicators for use across different regions of differing climatic  
609 conditions. Therefore, the search for SQIs which can be predicted by soil types continues.

610           For future work it might be worthwhile to make special consideration for the climatic,  
611 spatial and parent material variability in the sampling designs in addition to the inclusion of other  
612 promising soil attributes. Management factors should also be included (e.g. fertilizer regime). In  
613 terms of other key soil quality indicators, it would be interesting to include measures of key soil  
614 enzymes (e.g. cellulase, protease, phosphatase, sulfatase), their potential to release N<sub>2</sub>O and CH<sub>4</sub>,

615 their hydrophobicity and clay effects. A further consideration should be in the sampling design,  
616 to ensure equal and adequate representation of soil types in the aggregate vegetation classes in  
617 order to accurately capture the interaction effect.

618

## 619 **Supporting information**

620 **Figure S1** Map of the UK showing the individual soil sampling locations used in the study. The  
621 total land area is 209,331 km<sup>2</sup>.

622 **Table S2:** Shows conceptually comparable classification of the soils in the World reference base  
623 (WRB) Classification. Number in brackets indicates the number of samples for that soil type

624 **Table S3:** Land class classification with the corresponding land uses

625 **Table S4:** The cross tabulation table of Aggregate Vegetation classes (AVCs) versus soil types.

626

627

## 628 **Acknowledgements**

629 We would like to thank Ed Rowe Robert Mills, Robert Griffiths, and David Cooper at the  
630 UK Centre for Ecology and Hydrology for help with the experiments and data handling.  
631 Countryside Survey (CS) is funded by a consortium of UK government funded bodies led by the  
632 Natural Environment Research Council (NERC) and the Department for Environment, Food and  
633 Rural Affairs (Defra), which includes the Centre for Ecology and Hydrology, Countryside  
634 Council for Wales, Forestry Commission, Natural England, the Northern Ireland Environment  
635 Agency, the Scottish Government, Scottish Natural Heritage, and the Welsh Assembly  
636 Government. The completion of CS was only possible with the support and advice of many  
637 dedicated individuals from these and other organizations. The authors would like to thank the

638 land owners, farmers, and other land managers who gave permission for the field surveyors to  
639 collect data and samples from their land; without such cooperation scientific field studies like CS  
640 would not be possible. Additionally, the authors would especially like to acknowledge the major  
641 contribution made by the team of laboratory staff who processed all the soils and undertook the  
642 chemical analyses.

643

644

## 645 **References**

646 Anderson TH, Domsch KH. The metabolic quotient for CO<sub>2</sub> (qCO<sub>2</sub>) as a specific activity  
647 parameter to assess the effects of environmental conditions, such as pH, on the microbial  
648 biomass of forest soils. *Soil Biol. Biochem.* 1993; 25, 393-395.

649 Arshad MA, Martin S. Identifying critical limits for soil quality indicators in agro-ecosystems.  
650 *Agric. Ecosyst. Environ.* 2002; 88, 153-160.

651 Avery BW. *Soils of the British Isles*. CAB International, Wallingford, UK; 1990.

652 Ayoubi S, Khormali F. Use of factor analysis to evaluate soil quality in relation to land use  
653 change in Azadshar district, north of Iran. 15<sup>th</sup> International Congress of the International  
654 Soil Conservation Organization, Budapest, Hungary; 2008.

655 Ball DF. Loss on ignition as an estimate of organic matter and organic carbon in non-calcareous  
656 soils. *J. Soil Sci.* 1964; 15, 84-92.

657 Bellamy PH, Loveland PJ, Bradley RI, Lark RM, Kirk GJD. Carbon losses from all soils across  
658 England and Wales 1978-2003. *Nature* 2005; 437, 245-248.

659 Bonfante A, Terribile F, Bouma, J. Refining physical aspects of soil quality and soil health when  
660 exploring the effects of soil degradation and climate change on biomass production: an  
661 Italian case study, *SOIL*, 2019; 5, 1–14, <https://doi.org/10.5194/soil-5-1-2019>,

662 Box JD. Investigation of the Folin-Ciocalteu phenol reagent for the determination of  
663 polyphenolic substances in natural waters. *Water Res.* 1983; 17, 511-525.

664 Brejda JJ, Karlen LD, Smith LJ, Allan LD. Identification of regional soil quality factors and  
665 indicators: II. Loess hills and Palouse prairie. *Soil Sci. Soc. Am. J.* 2000b; 64, 2125-2135.

666 Brejda JJ, Moorman BT, Karlen LD, Dao HT. Identification of regional soil quality factors and  
667 indicators: I. Central and southern high plains. *Soil Sci. Soc. Am. J.* 2000a; 64, 2115-2124.

668 Bünemann EK, Bongiorno G, Bai Z, Creamer RE, De Deyn G, de Goede R, Brussaard L. Soil  
669 quality – A critical review. *Soil Biology and Biochemistry*, 2018; 120, 105–125. <https://doi.org/10.1016/j.soilbio.2018.01.030>

670 Campbell, G. A., Lilly, A., Corstanje,

671 Buyer SJ, Roberts, PD, Russek-Cohen E. Soil and plant effects on microbial community  
672 structure. *Can. J. Microbiol.* 2002; 48, 955-964.

673 Carter MR, Gregorich EG, Anderson DW, Doran JW, Janzen HH, Pierce FJ. Concepts of soil  
674 quality and their significance, In: Gregorich, E.G., Carter, M.R., (Eds) *Soil Quality for Crop*  
675 *Production*, Elsevier, Amsterdam, 1997; 1-19.

676 Carter MR. Soil quality for sustainable land management: Organic matter and aggregation  
677 interactions that maintain soil functions. *Agron. J.* 2002; 94, 38-47.

678 Cavigelli AM, Lengnick LL, Buyer SJ, Fravel DC, Handoo Z, McCarty G, Millner P, Sikora L.,  
679 Wright S, Vinyard B, Rabenhorst M. Landscape level variation in soil resources and  
680 microbial properties in a no-till corn field. *Appl. Soil Ecol.* 2005; 29, 99-123.

681 Cherubin MR, Karlen DL, Cerri CEP, Franco ALC, Tormena CA, Davies CA, et al.,. Soil  
682 Quality Indexing Strategies for Evaluating Sugarcane Expansion in Brazil. PLoS ONE.  
683 2016; 11(3): e0150860. <https://doi.org/10.1371/journal.pone.0150860>

684 Dagnachew M, Moges A, Kassa AK. “Effects of Land Uses on Soil Quality Indicators: The Case  
685 of Geshy Subcatchment, Gojeb River Catchment, Ethiopia,” *Applied and Environmental*  
686 *Soil Science*, vol. 2019, Article ID 2306019, 2019; 11, (Cited August 2020) available  
687 from <https://doi.org/10.1155/2019/2306019>.

688 DeForest LJ, Zak RD, Pregitzer SK, Burton JA. Atmospheric nitrate deposition and enhanced  
689 dissolved organic carbon leaching: test of a mechanism. *Soil Sci. Soc. Am. J.* 2005; 69,  
690 1233-1237.

691 Doran JW, Coleman DC, Bedzicek DF, Stewart BA. Defining soil quality for a sustainable  
692 environment. SSSA Special Publication 35, SSSA and ASA, Madison, WI; 1994.

693 Doran JW, Safley M. Defining and assessing soil health and sustainable productivity. In:  
694 Punkhurst, C., Doube, B.M., Gupta, V.V.S.R., (Eds), *Biological Indicators of Soil Health*,  
695 CAB International, New York. 1997; 1-27.

696 Elliott ET. Rationale for developing bioindicators of soil health. In: Punkhurst, C, Doube BM,  
697 Gupta VVSR, (Eds), *Biological Indicators of Soil Health*, CAB International, New York.  
698 1997; 49-78.

699 Embacher A, Zsolnay A, Gattinger A, Munch JC. The dynamics of water extractable organic  
700 matter (WEOM) in common arable topsoils: I. Quantity, quality and function over a three  
701 year period. *Geoderma*. 2007; 139, 11-22.

702 Emmett BA, Frogbrook ZL, Chamberlain PM, Griffiths R, Pickup R, Poskitt J, Reynolds B,  
703 Rowe E, Rowland P, Spurgeon D, Wilson J, Wood CM. Countryside Survey Technical  
704 Report No.03/07, NERC Centre for Ecology and Hydrology, Bangor, UK; 2008.

705 Emmett BA. *National Soil Monitoring Network: Review and assessment study. Final*  
706 *Report*. Centre for Ecology and Hydrology, 42pp. (CEH Project Number: C03179, Project  
707 LQ09) (Unpublished); 2006.

708 Emmett BA, Reynolds B, Chamberlain PM, Rowe E, Spurgeon D, Brittain SA, Frogbrook Z,  
709 Hughes S, Lawlor AJ, Poskitt J, Potter E, Robinson DA, Scott A, Wood CL, Woods C.  
710 CountrySide Technical Report No. 9/07: Soils Report from 2007. NERC Centre for Ecology  
711 & Hydrology, Bangor, UK; 2010.

712 Environmental Agency. Design and operation of a UK soil monitoring network, Science Report  
713 – SC060073, Bristol UK; 2008

714 Estrada-Herrera IR, Hidalgo-Moreno C, Guzmán-Plazola R, Suárez JJA, Navarro-Garza H,  
715 Etchevers-Barra JD. Soil quality indicators to evaluate soil fertility. *Agrociencia* 2017; 51,  
716 813–831.

717 Field A. *Discovering statistics using SPSS: IBM, Introducing statistical methods*. SAGE  
718 Publications, London; 2005.

719 Fitzpatrick EA. *Soils: Their Formation, Classification and Distribution*. Longman Press, London,  
720 UK; 1983.

721 Fließbach A, Oberholzer H, Gunst L, Mader P. Soil organic matter and biological soil quality  
722 indicators after 21 years of organic and conventional farming. *Agric. Ecosyst. Environ.*  
723 2006; 118, 273-284.

724 Ghaemi M, Astaraei AR, Emami H, Nassiri MM, Sanaeinejad SH. Determining soil indicators  
725 for soil sustainability assessment using principal component analysis of Astan Quds- east of  
726 Mashhad- Iran. *J. Soil Sci. Plant Nut.* 2014; 14: 987-1004.

727 Girvan SM, Bullimore J, Pretty NJ, Osborn AM, Ball SB. Soil type is the primary determinant of  
728 the composition of the total and active bacterial communities in arable soils. *Appl. Environ.*  
729 *Microbiol.* 2003; 69, 1800-1809.

730 Griffin G, Jokela W, Ross D. Recommended soil nitrate-N tests. In: Recommended soil testing  
731 procedures for the northeastern United States, Northeastern Regional Publication No. 493,  
732 Vermont. USA; 1995.

733 Herrick JE. Soil quality: an indicator of sustainable land management? *Appl. Soil Ecol.* 2002; 15,  
734 75-83.

735 Hodgson JM. *Soil Survey Field Handbook*. Soil Survey Technical Monograph No. 5, pp99.  
736 Harpenden, UK; 1976.

737 Jenny H. *Factors of soil formation: A system of quantitative pedology*. Dover Publications Inc.,  
738 New York; 1994.

739 Joergensen RG, Mueller T. The fumigation extraction method to estimate soil microbial biomass:  
740 calibration of the kEC-factor. *Soil Biol. Biochem.* 1996a; 28, 25-31.

741 Joergensen RG, Mueller T. The fumigation-extraction method to estimate soil microbial  
742 biomass: Calibration of the kEN value. *Soil Biol. Biochem.* 1996b; 28, 33-37.

743 Jones DL, Owen AG, Farrar J.F. Simple method to enable the high resolution determination of  
744 total free amino acids in soil solutions and soil extracts. *Soil Biol. Biochem.* 2002; 34, 1893-  
745 1902.

746 Karlen DL, Andrews SS, Doran JW. Soil quality: Current concepts and applications. *Adv. Agron.*  
747 2001; 74, 1-40.

748 Karlen DL, Mausbach MJ, Doran JW, Cline RG, Harris RF, Schuman GE. Soil quality: A  
749 concept, definition, and framework for evaluation. *Soil Sci. Soc. Am. J.* 1997; 61, 4-10.

750 Lagomarsino A, Moscatelli MC, Di Tizio A, Mancinelli R, Grego S, Marinari S. Soil  
751 biochemical indicators as a tool to assess the short-term impact of agricultural management  
752 on changes in organic C in a Mediterranean environment. *Ecol. Indic.* 2009; 9, 518-527.

753 Larson, W.E., Pierce, F.J. Conservation and enhancement of soil quality. In: *Evaluation for*  
754 *sustainable land management in the developing world. Vol. 2. IBSRAM Proceedings, 12,*  
755 *Bangkok, Thailand. 1991; 175-203.*

756 Letey J, Sojka RE, Upchurch DR, Cassel DK, Olson K, Payne B, Petrie S, Price G, Reginato RJ,  
757 Scott HD, Smethurst P, Triplett G. Deficiencies in the soil quality concept and its  
758 application. *Soil Water Conservat.* 2003; 58, 180-187.

759 Maynard, D.G., Kalra, Y.P.,. Nitrates and exchangeable ammonium nitrogen. pp. 25-38. In:  
760 Carter, M.R. (Ed). *Soil sampling and methods of analysing.* CRC Press, Florida, USA; 1993.

761 Nielsen MN, Winding A. Microorganisms as indicators of soil health, NERI Technical Report  
762 No. 388. National Environmental Research Institute, Denmark; 2002.

763 Ohio State University. Soil health and soil quality, Piketon, Ohio. 1998; (cited August 2020)  
764 available from <http://www.ag.ohio-state.edu/~prec>

765 Ohno T, First RP. Assessment of the Folin and Ciocalteu's method for determining soil phenolic  
766 carbon. *J. Environ. Qual.* 1998; 27, 776-782.

767 Parkin TB. Spatial variability of microbial processes in soil—a review. *J. Environ. Qual.* 1993;  
768 22, 409-417.



769 Rapport JD, McCullum J, Miller HM. Soil Health: its relationship to ecosystem health. In:  
770 Punkhurst C, Doube BM, Gupta VVSR. (Eds) Biological indicators of soil health, CAB  
771 International, New York, 1997; 29-48.

772 Schloter M, Nannipieri P, Sørensen SJ, van Elsas JD. Microbial indicators for soil quality.  
773 *Biology and Fertility of Soils*. 2018; 54: (1), 1-10. [https://doi.org/10.1007/s00374-017-](https://doi.org/10.1007/s00374-017-1248-3)  
774 1248-3

775 Searie PL. The Berthelot or indophenol reaction and its use in the analytical chemistry of  
776 nitrogen: A review. *Analyst* 1984; 109, 549- 568.

777 Seybold CA, Mausbach MJ, Karlen DL, Rogers HH. Quantification of soil quality. In: Lal R,  
778 Kimble JM, Follett RF, Stewart BA (Eds.), *Soil Processes and the Carbon Cycle*. Advances  
779 in Soil Science. CRC Press, New York. 1997; 387-404.

780 Shukla MK, Lal R, Ebinger M. Determining soil quality indicators by factor analysis. *Soil Tillag.*  
781 *Res.* 2006; 87, 194-204.

782 Simfukwe P, Hill PW, Emmett BA, Jones DL. Soil classification provides a poor indicator of  
783 carbon turnover rates in soil. *Soil Biol. Biochem.* 2009; 43, 1688-1696

784 Smart SM, Robertson JC, Shield EJ, van de Poll HM. Locating eutrophication effects across  
785 British vegetation between 1990 and 1998. *Glob. Chang. Biol.* 2003; 9, 1763-1774.

786 Soil Survey Staff. *Soil Taxonomy: A basic system of soil classification for making and*  
787 *interpreting soil surveys*, Agriculture handbook, 1999; No. 436, Washington, DC.

788 Sojka RE, Upchurch DR. Reservations regarding the soil quality concept. *Soil Sci. Soc. Am. J.*  
789 1999; 63, 1039- 1054.

790 Sojka RE, Upchurch DR, Borlaug N.E. Quality soil management or soil quality management:  
791 performance versus semantics. *Adv. Agron.* 2003; 79, 1-68.

792 Sparling, G.P. Soil microbial biomass, activity and nutrient cycling as indicators of soil health. In:  
793 Pankhurst C, Doube BM, Gupta VVSR, (Eds.), Biological Indicators of Soil Health. CAB  
794 International, Wallingford, 1997; 97-119.

795 SPSS 15.0 for windows, 2006. SPSS 15.0 online help guide, SPSS Inc., Chicago, IL.

796 Ulrich A, Becker R. Soil parent material is a key determinant of the bacterial community  
797 structure in arable soils. FEMS Microbiol. Ecol. 2006; 56, 430-443.

798 Taft HE, Cross PA, Jones DL. Efficacy of mitigation measures for reducing greenhouse gas  
799 emissions from intensively cultivated peatlands, Soil Biology and Biochemistry, 2018, doi:  
800 10.1016/j.soilbio.2018.08.020.

801 Vance ED, Brookes PC, Jenkinson DS. An extraction method for measuring soil microbial  
802 biomass C. Soil Biol. Biochem. 1987; 19, 703-707.

803 Velasquez E, Lavelle P, Andrade M. GISQ, a multifunctional indicator of soil quality. Soil Biol.  
804 Biochem. 2007; 39, 3066-3980.

805 Winding A, Hund-Rinkeb K, Rutgers M. The use of microorganisms in ecological soil  
806 classification and assessment concepts. Ecotoxicol. Environ. Saf. 2005; 62, 230-248.

807 Wishart D. Numerical classification method for deriving natural classes. Nature 1968; 221, 97-  
808 98.

809 Yerokun OA, Chikunta S, Mambwe D. An evaluation of spectroscopy and loss on ignition  
810 methods for estimating soil organic carbon in Zambian soils. Int. J. Agric. Res. 2007; 2, 965-  
811 970.

812 Zsolnay A, Baigar E, Jiminez M, Steinweg, B, Saccomandi F. Differentiation with fluorescence  
813 spectroscopy the sources of dissolved organic carbon. Chemosphere. 1999; 38, 45-50.

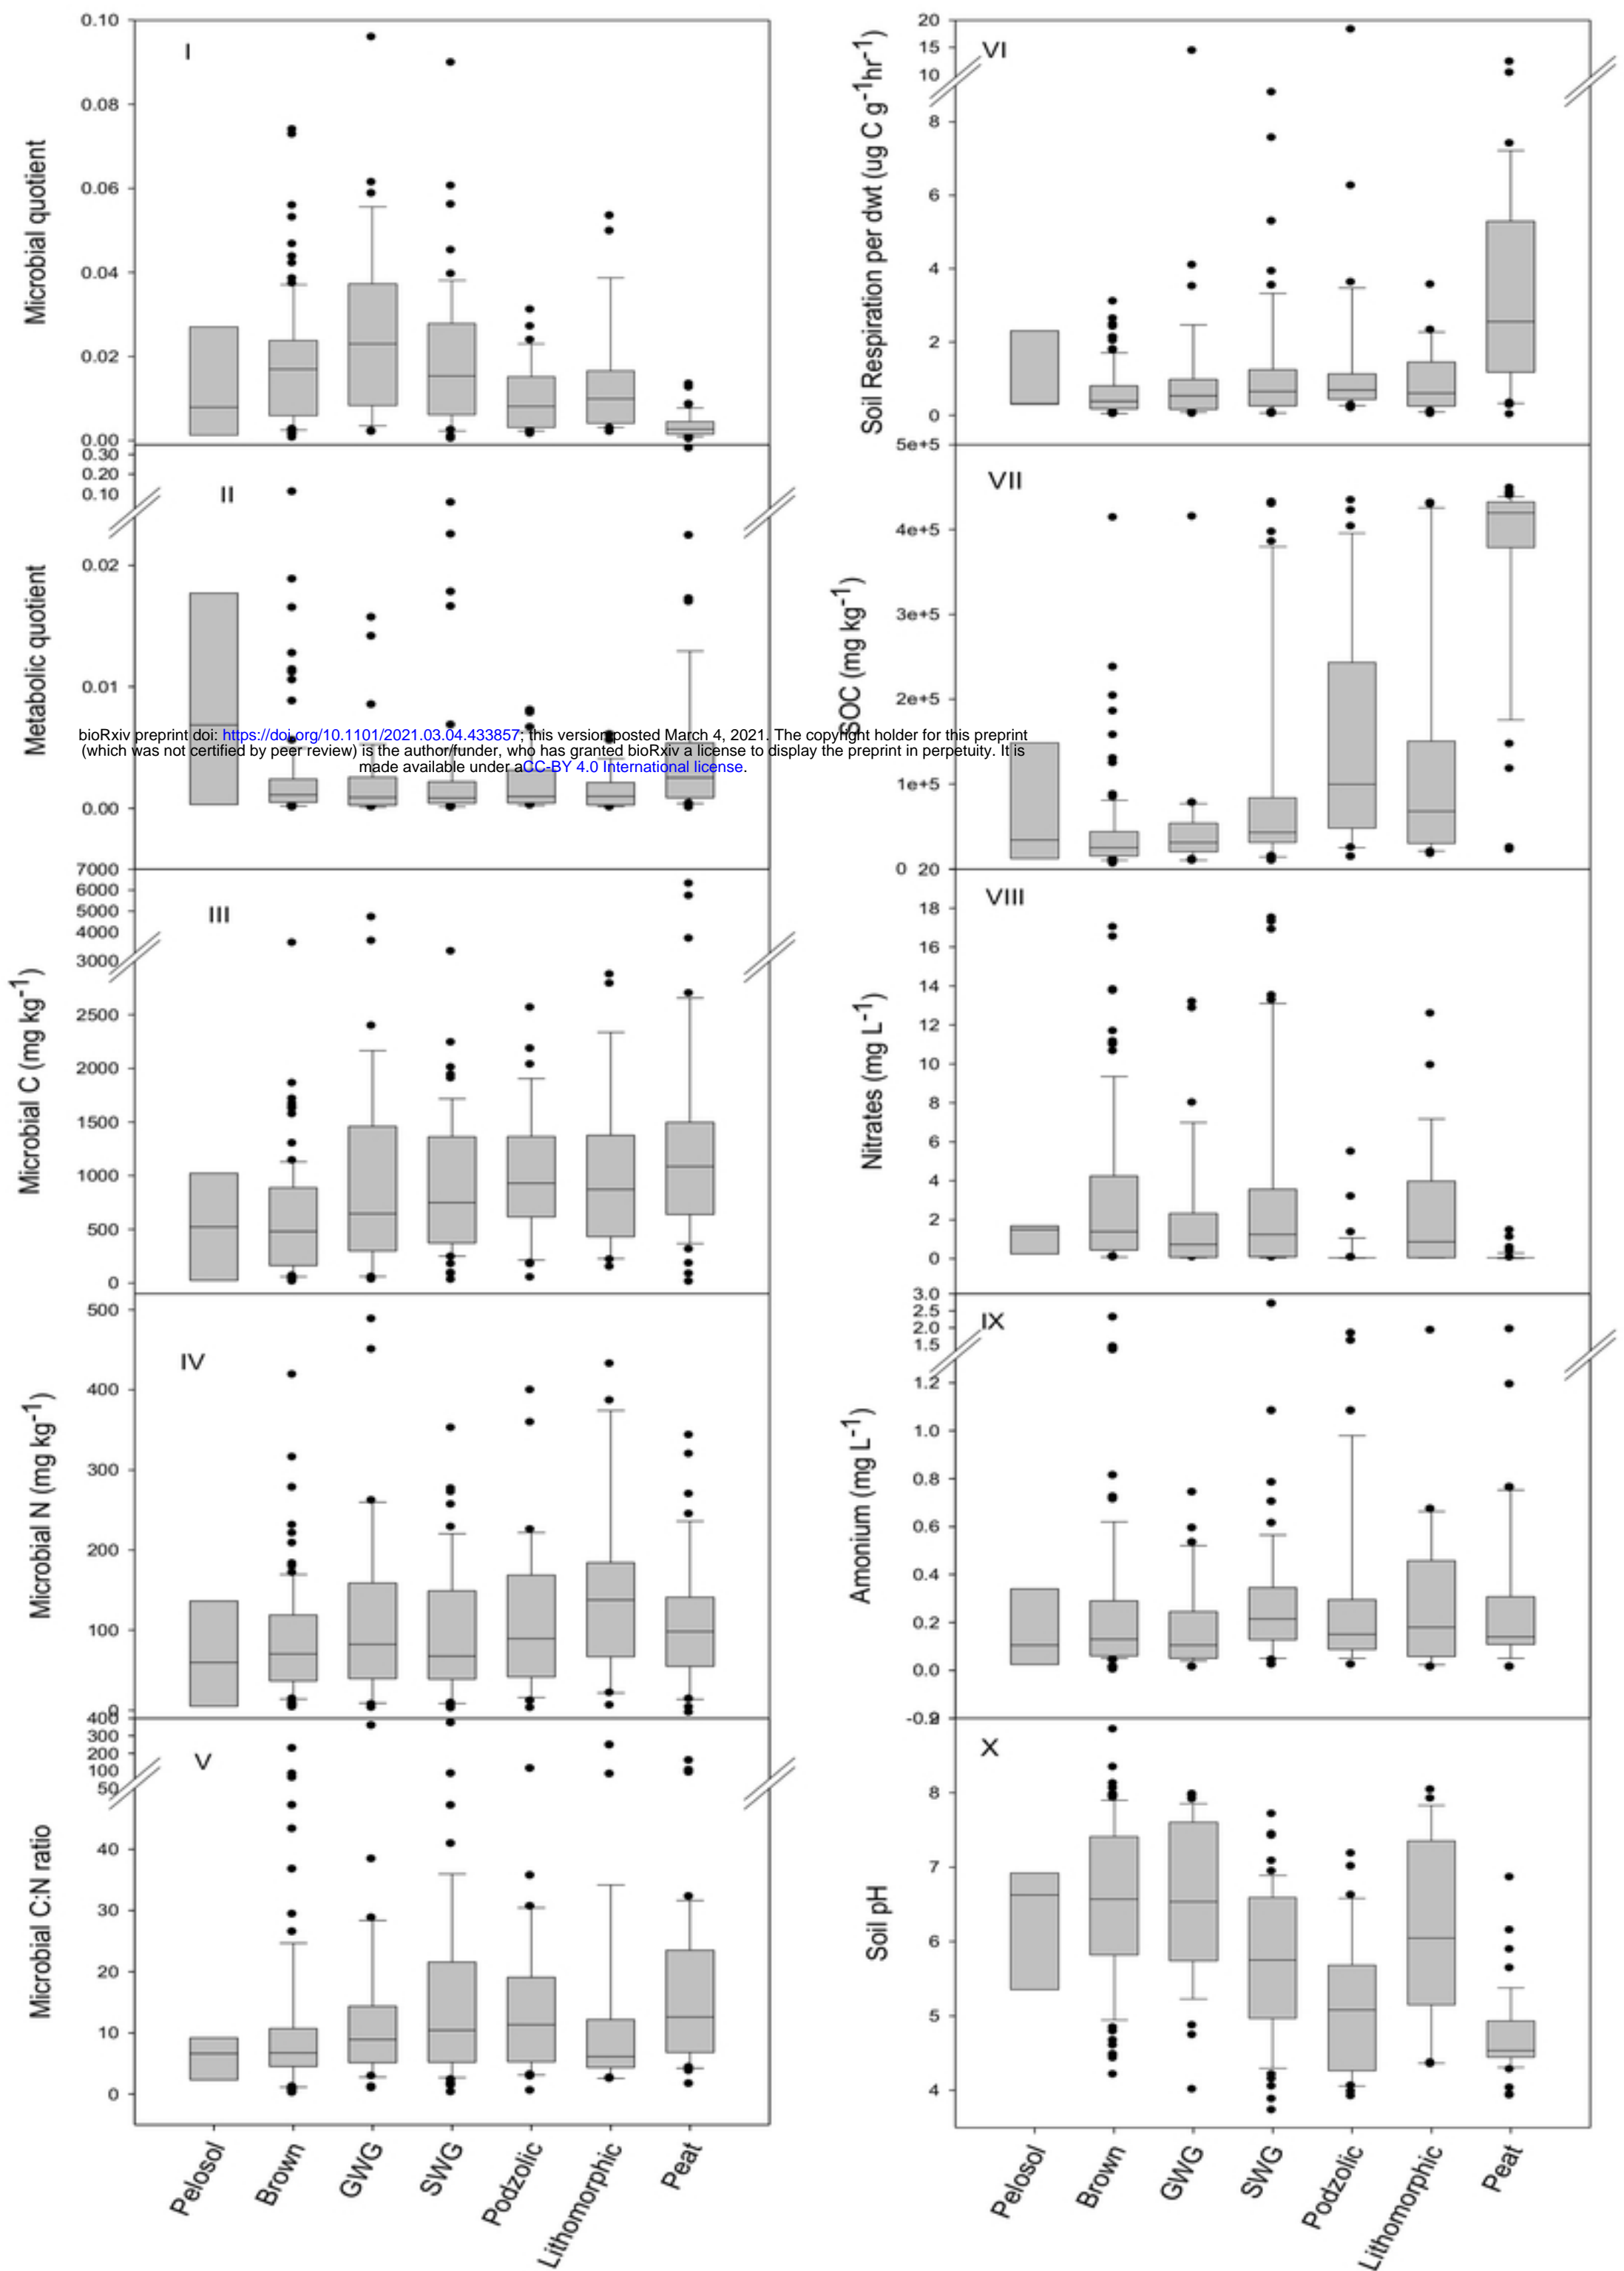

Figure 1

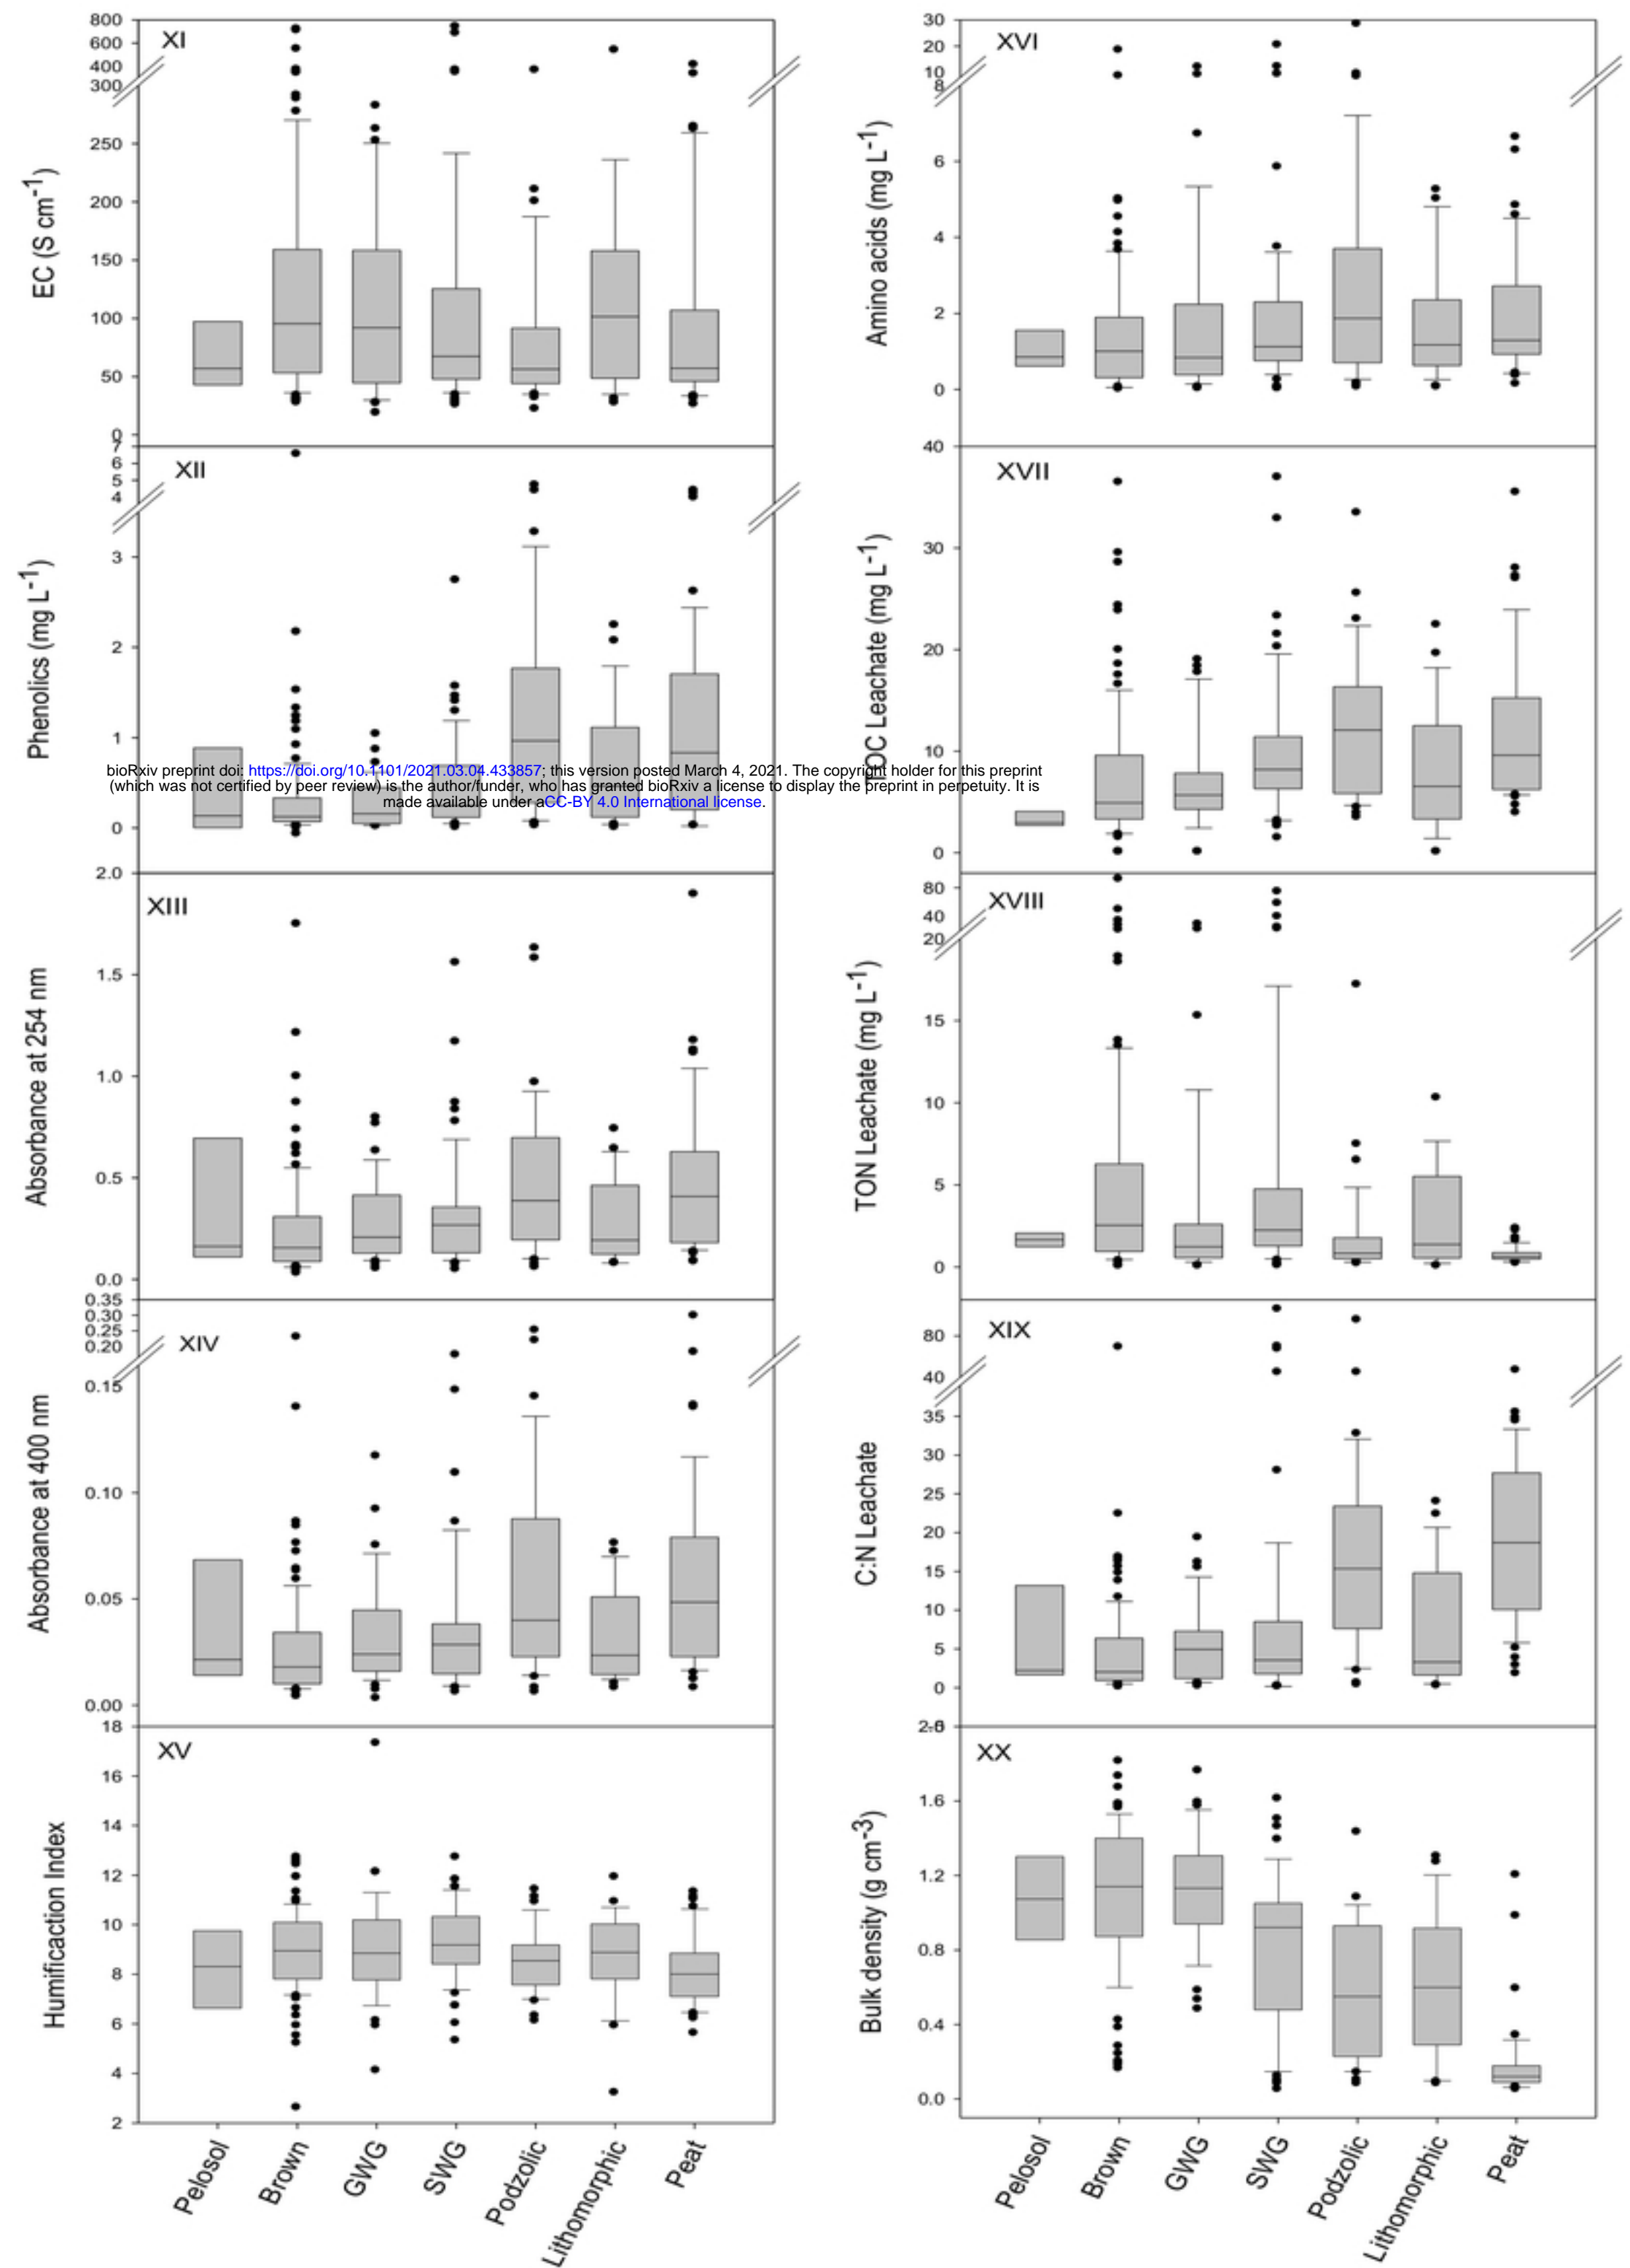

Figure 1 continued

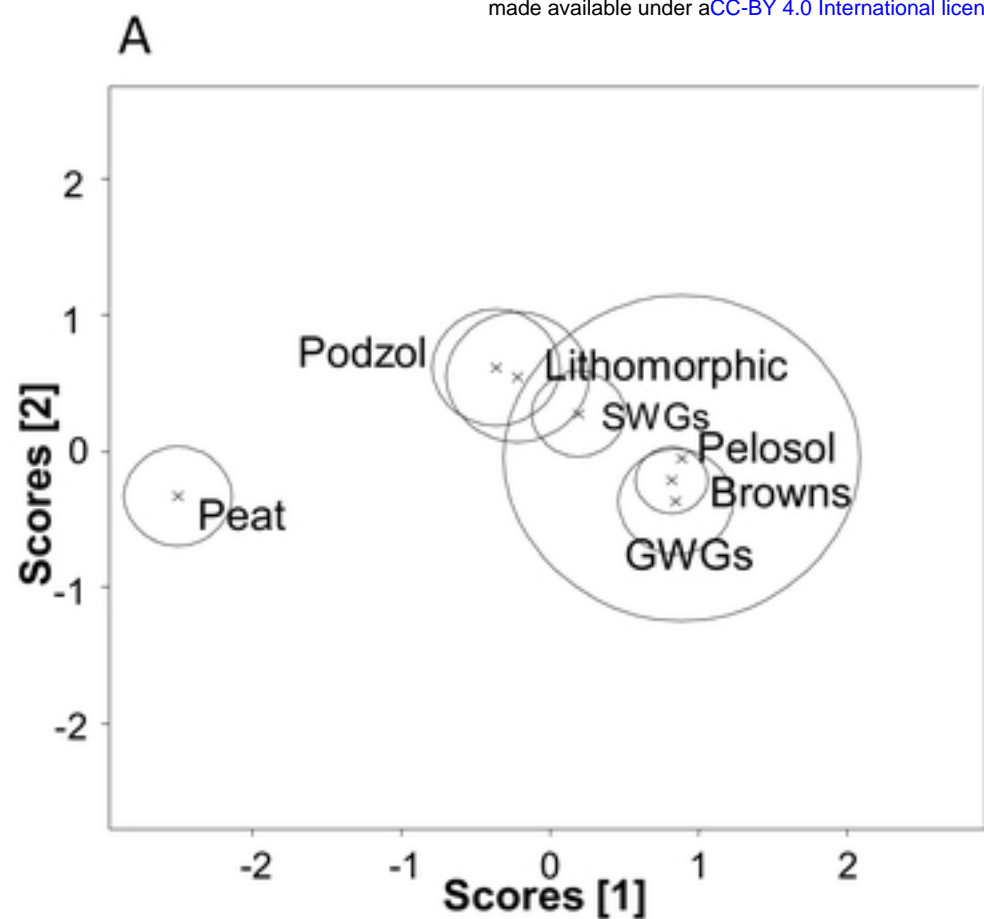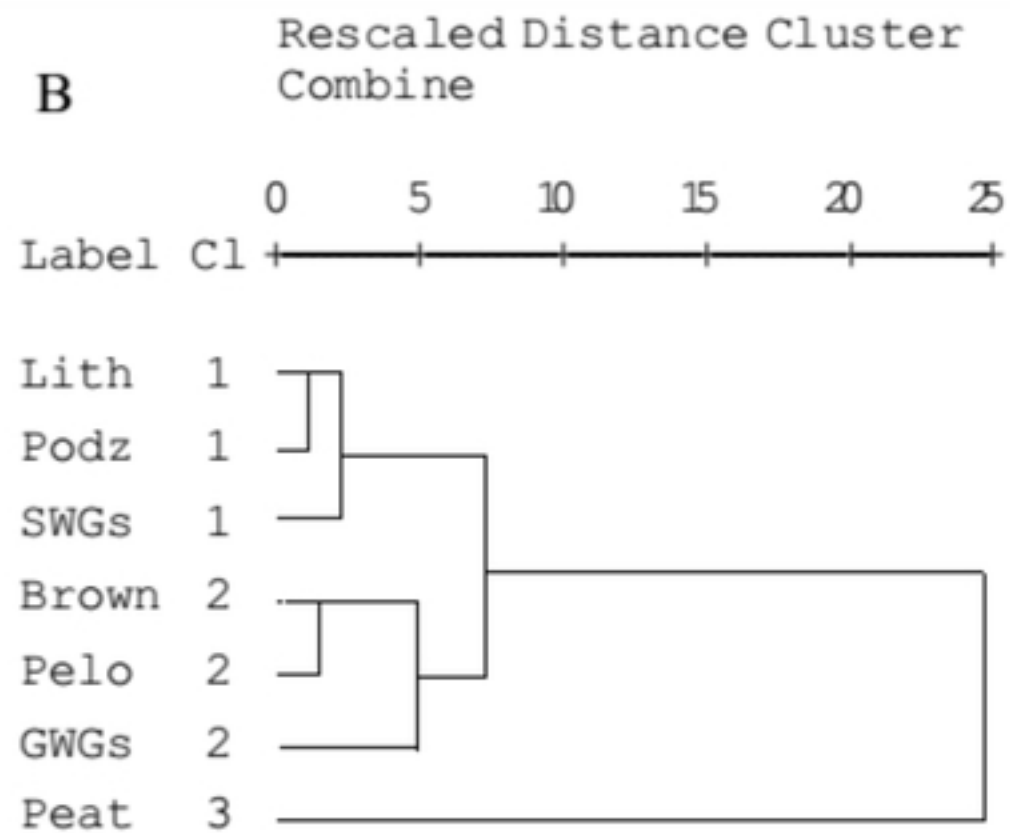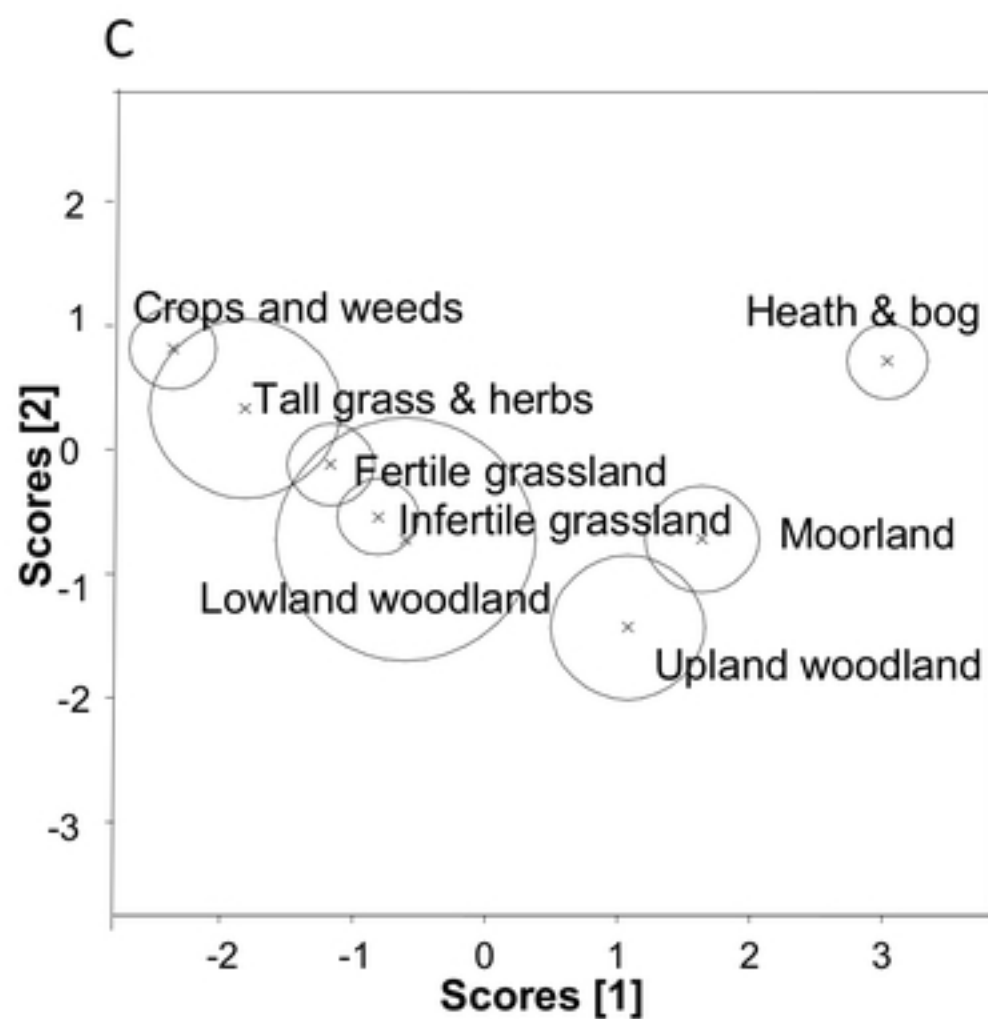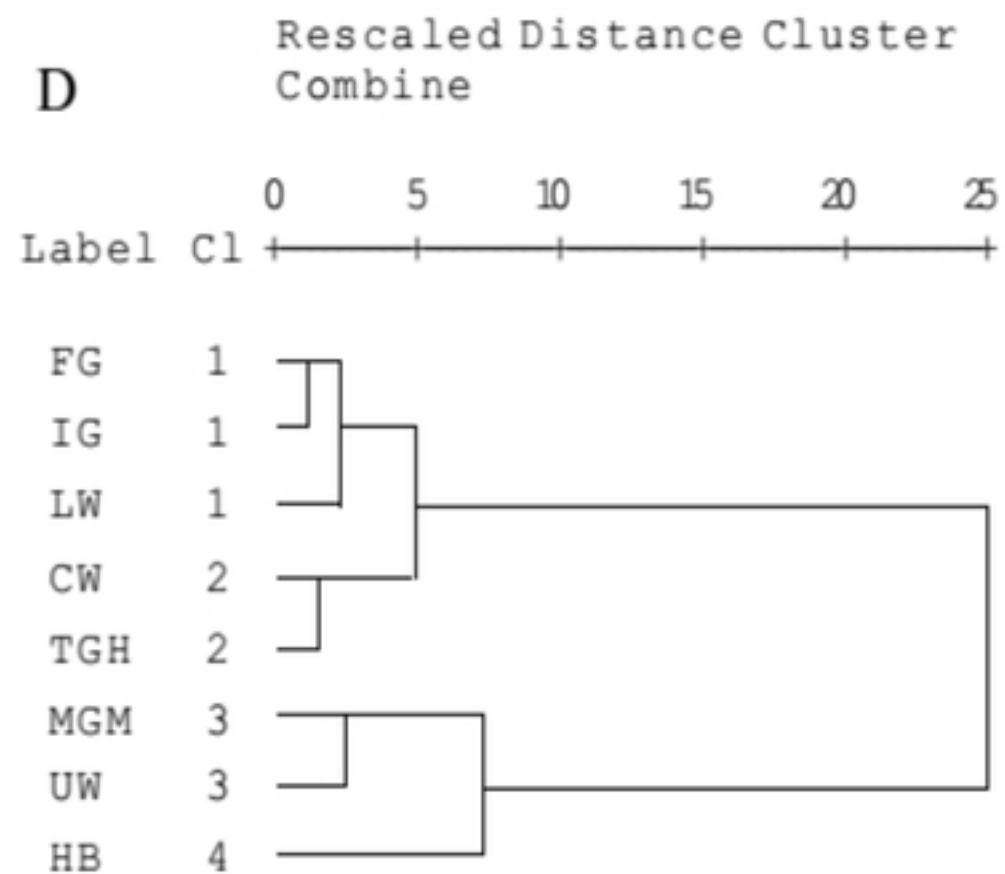

Figure 2

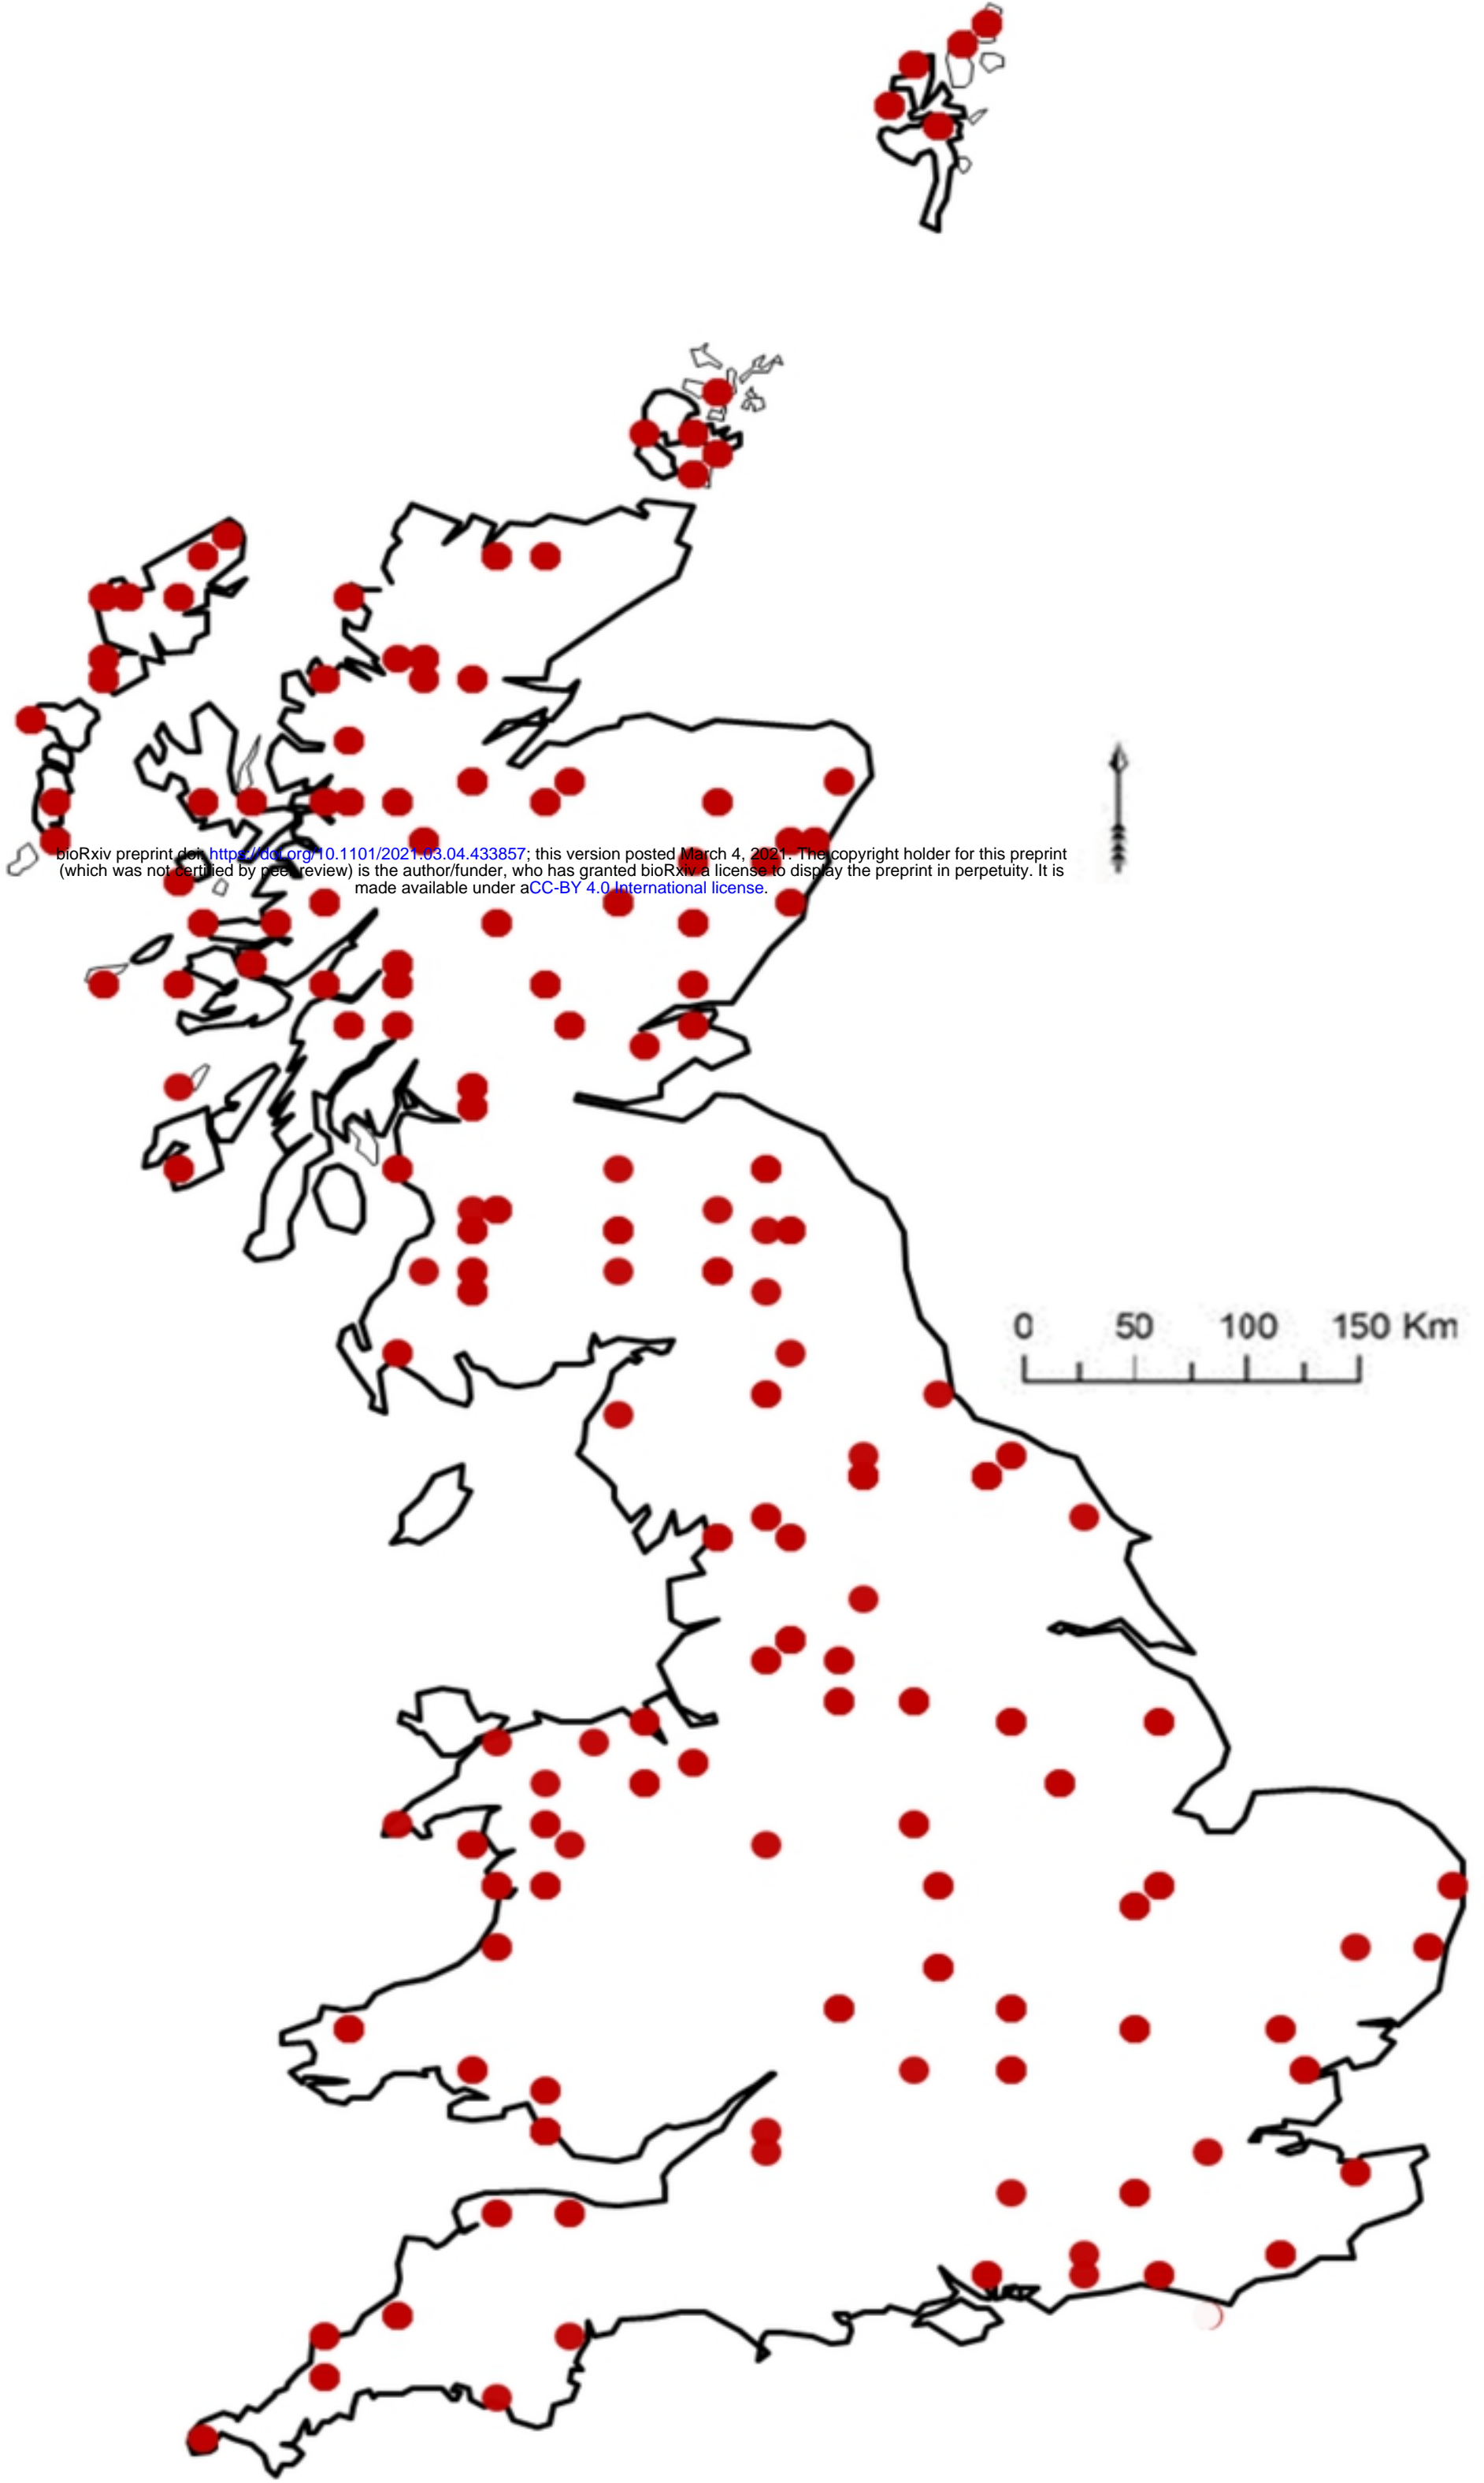

FigureS1
